# Supplementary material
Source: PubMed Central journal article supplement (PMC3504359)
Supplement: NIHMS29061-supplement-3.pdf [file NIHMS29061-supplement-3.pdf]

**Supplementary Table 1: Vasculitis patient demographics and laboratory data**

1

| Parameter                | Units (ref range)            | 8.1 mean (SEM)     | 8.2 mean (SEM)   | p    | adj p |
|--------------------------|------------------------------|--------------------|------------------|------|-------|
| BVAS score t0            |                              | 13.8 (1.6)         | 13.3 (1.3)       | 0.59 | ns    |
| BVAS score t3months      |                              | 2.2 (0.9)          | 2.7 (0.6)        | 0.64 | ns    |
| Gender                   |                              | 9M / 10F           | 15M / 25F        | 0.47 | ns    |
| Ethnicity                |                              | 18 C / 1 A         | 40 C             | 1    | ns    |
| ANCA status              |                              | 4MPO / 15PR3 / 1UK | 16MPO / 22PR3    | 0.12 | ns    |
| Pre-existing disease     |                              | 5Y / 14N           | 14Y / 26N        | 0.5  | ns    |
| Age                      | years                        | 57.5 (4)           | 62 (2.4)         | 0.25 | ns    |
| Total IgG                | g/l (6 - 13)                 | 13.2 (1.1)         | 12.7 (0.7)       | 0.65 | ns    |
| CD3                      | % of PBMC                    | 72.9 (3.3)         | 73.9 (2.6)       | 0.81 | ns    |
| CD4                      | % of PBMC                    | 46.6 (2.1)         | 48.6 (2.6)       | 0.65 | ns    |
| CD8                      | % of PBMC                    | 24.2 (3)           | 23.8 (2.4)       | 0.94 | ns    |
| CRP t0                   | mg/l (0-6)                   | 67.6 (15.8)        | 58.1 (11.6)      | 0.65 | ns    |
| ESR t=0                  | mm/h (5 - 15)                | 62.3 (9.5)         | 63.5 (6.6)       | 0.86 | ns    |
| Total Leucocyte count t0 | $\times 10^9/l$ (4 - 11)     | 12.5 (1.6)         | 11.3 (0.7)       | 0.79 | ns    |
| Neutrophil count t0      | $\times 10^9/l$ (2 - 8)      | 9.97 (1.5)         | 9.14 (0.68)      | 0.98 | ns    |
| Lymphocyte t0            | $\times 10^9/l$ (1 - 4.5)    | 1.62 (0.25)        | 1.36 (0.09)      | 0.63 | ns    |
| Serum Creatinine t0      | $\mu\text{mol/l}$ (35 - 125) | 174.6 (35.2)       | 233.1 (39.9)     | 0.37 | ns    |
| Serum Creatinine final   | $\mu\text{mol/l}$ (35 - 125) | 160.5 (33)         | 133.4 (15.8)     | 0.56 | ns    |
| Mean change SCr          | %                            | plus 18 (23.5)     | minus 21.2 (4.8) | 0.56 | ns    |
| Renal involvement        |                              | 11Y / 8N           | 28Y / 12N        | 0.36 | ns    |
| PR3 titre                | <6                           | 176.6 (63)         | 94.6 (46.9)      | 0.47 | ns    |
| MPO titre                | <6                           | 83.9 (41.3)        | 99.1 (32)        | 0.96 | ns    |

adj p = Bonferroni adjusted p-value, ref range = reference range, SEM = standard error of mean, t0 = at time zero enrolment, t3months = at 3 month follow-up timepoint, M=male, F=female, ANCA = anti-neutrophil cytoplasmic antibody, MPO = myeloperoxidase, PR3 = proteinase3, WG = Wegener's granulomatosis, MPA = microscopic polyangiitis, ns = not significant, CRP = C-reactive protein, ESR = erythrocyte sedimentation rate, PBMC = peripheral blood mononuclear cells, BVAS = Birmingham Vasculitis Activity Score, mean change SCr = mean change in serum creatinine value between enrolment and 1000 days follow-up

**Supplementary Table 2 : Vasculitis Cohort Therapy**

|                             |                       | <b>V8.1</b> | <b>%</b> | <b>V8.2</b> | <b>%</b> | <b>p</b> |
|-----------------------------|-----------------------|-------------|----------|-------------|----------|----------|
| <b>Prior therapy</b>        | Prednisolone          | 6/19        | 32       | 17/40       | 43       | 0.42     |
|                             | Cyclophosphamide      | 4/19        | 21       | 10/40       | 25       | 0.74     |
|                             | Rituximab             | 0/19        | 0        | 2/40        | 5        | 0.33     |
|                             | Azathioprine          | 5/19        | 26       | 9/40        | 23       | 0.75     |
|                             | Mycophenolate Mofetil | 4/19        | 21       | 6/40        | 15       | 0.56     |
|                             | Plasma Exchange       | 2/19        | 11       | 1/40        | 3        | 0.19     |
|                             | IVIg                  | 1/19        | 5        | 3/40        | 8        | 0.75     |
|                             | Deoxyspergualin       | 1/19        | 5        | 2/40        | 5        | 0.97     |
|                             | none                  | 11/19       | 58       | 24/40       | 60       | 0.88     |
| <b>Current treatment t0</b> | Prednisolone          | 8/19        | 42       | 15/40       | 38       | 0.73     |
|                             | Mycophenolate Mofetil | 2/19        | 11       | 2/40        | 5        | 0.43     |
|                             | Azathioprine          | 0/19        | 0        | 3/40        | 8        | 0.24     |
|                             | none                  | 11/19       | 58       | 25/40       | 63       | 0.73     |
| <b>Induction therapy t0</b> | Prednisolone          | 19/19       | 100      | 40/40       | 100      | 1        |
|                             | Cyclophosphamide      | 8/19        | 42       | 22/40       | 55       | 0.35     |
|                             | Rituximab             | 1/19        | 5        | 8/40        | 20       | 0.14     |
|                             | Azathioprine          | 0/19        | 0        | 5/40        | 13       | 0.06     |
|                             | Mycophenolate Mofetil | 8/19        | 42       | 13/40       | 33       | 0.47     |
|                             | Adalimumab            | 3/19        | 16       | 3/40        | 8        | 0.32     |
|                             | Plasma Exchange       | 1/19        | 5        | 1/40        | 3        | 0.58     |
|                             | IVIg                  | 0/19        | 0        | 1/40        | 3        | 0.48     |
|                             | Deoxyspergualin       | 4/19        | 21       | 5/40        | 13       | 0.39     |
| <b>Follow up therapy</b>    | Prednisolone          | 19/19       | 100      | 40/40       | 100      | 1        |
|                             | Cyclophosphamide      | 10/19       | 53       | 22/40       | 55       | 0.86     |
|                             | Rituximab             | 6/19        | 32       | 11/40       | 28       | 0.75     |
|                             | Azathioprine          | 6/19        | 32       | 23/40       | 58       | 0.47     |
|                             | Mycophenolate Mofetil | 9/19        | 47       | 20/40       | 50       | 0.85     |
|                             | Adalimumab            | 2/19        | 11       | 3/40        | 8        | 0.7      |
|                             | Plasma Exchange       | 2/19        | 11       | 1/40        | 3        | 0.19     |
|                             | IVIg                  | 1/19        | 5        | 2/40        | 8        | 0.97     |
|                             | Deoxyspergualine      | 4/19        | 21       | 5/40        | 13       | 0.39     |
|                             | Methotrexate          | 2/19        | 11       | 5/40        | 13       | 0.83     |

t0 = at time zero enrolment, Prior therapy = therapy administered prior to enrolment, Current therapy = therapy being given at time of enrolment bleed, Induction therapy = therapy given after enrolment bleed to control t0 disease flare, Follow-up therapy = therapy given at any timepoint during subsequent follow-up. Note that the nature of therapy but not dosage is given and that, by definition, each flare of disease required increased immunosuppression with resulting higher cumulative doses during follow-up in subgroup 8.1.

**Supplementary Table 3.** Gene expression signature defining prognostic subgroups in AAV. 1228 genes showing differential expression between subgroups 8.1 and 8.2 in a cohort of 59 AAV patients with fold-change greater than 2 and FDR-corrected p-value <0.05. Fold-change (FC) and FDR-corrected p-value (FDR p) are given for each gene along with Gene Symbol and Genbank Accession identifier.

| <b>FC</b> | <b>FDR p</b> | <b>Gene Symbol</b> | <b>Alternative Gene Symbol</b> | <b>Genbank ID</b> |
|-----------|--------------|--------------------|--------------------------------|-------------------|
| 5.244     | 9.04E-10     | NME1               | NME1                           | NM_000269         |
| 5.124     | 7.43E-09     |                    | #NA                            | S56528            |
| 4.839     | 7.92E-08     | XTP2               | XTP2                           | NM_015172         |
| 4.826     | 1.54E-14     | TOB1               | TOB1                           | NM_005749         |
| 4.713     | 8.91E-19     | EXOSC8             | OIP2                           | NM_181503         |
| 4.61      | 2.16E-14     | PRDX2              | PRDX2                          | NM_005809         |
| 4.584     | 2.26E-09     | IL7R               | IL7R                           | NM_002185         |
| 4.526     | 1.11E-09     | DKFZP564J0863      | LOC283241                      | NM_175893         |
| 4.433     | 1.31E-06     | PTTG3              | PTTG3                          | NM_021000         |
| 4.308     | 1.62E-08     | NELL2              | NELL2                          | NM_006159         |
| 4.275     | 2.66E-14     | TMP21              | TMP21                          | NM_006827         |
| 4.258     | 7.61E-10     | CRTAM              | CRTAM                          | NM_019604         |
| 4.213     | 9.92E-10     |                    | #NA                            | HSTCRA10          |
| 4.195     | 4.61E-05     | CD8B1              | CD8B1                          | NM_172100         |
| 4.169     | 7.18E-10     | CD8A               | CD8A                           | NM_001768         |
| 4.146     | 1.94E-20     | BUB3               | BUB3                           | NM_004725         |
| 4.144     | 5.30E-06     | CD69               | CD69                           | NM_001781         |
| 4.128     | 2.30E-13     | PARP8              | FLJ21308                       | NM_024615         |
| 4.107     | 3.80E-11     | SLAMF6             | KALI                           | NM_052931         |
| 4.002     | 4.85E-10     |                    | CIC                            | BC007568          |
| 3.993     | 2.84E-10     | SAMD3              | MGC35163                       | NM_152552         |
| 3.898     | 3.10E-10     | NDUFA9             | NDUFA9                         | NM_005002         |
| 3.896     | 9.24E-13     | DOCK9              | zizimin1                       | NM_015296         |
| 3.889     | 5.24E-09     | PCNT2              | PCNT2                          | NM_006031         |
| 3.857     | 1.10E-10     | BTN3A1             | BTN3A1                         | NM_007048         |
| 3.848     | 1.15E-07     | ARID5B             | .                              | XM_084482         |
| 3.834     | 1.89E-08     | ETS1               | ETS1                           | NM_005238         |
| 3.821     | 2.30E-13     | TRA1               | TRA1                           | NM_003299         |
| 3.803     | 5.69E-10     | ITK                | ITK                            | NM_005546         |
| 3.796     | 9.82E-12     | APOBEC3C           | APOBEC3C                       | NM_014508         |
| 3.788     | 2.61E-10     | ZFP36L2            | ZFP36L2                        | NM_006887         |
| 3.777     | 6.51E-09     | SH2D1A             | SH2D1A                         | NM_002351         |
| 3.768     | 3.23E-09     |                    | #NA                            | HSM803120         |
| 3.767     | 6.82E-11     |                    | FLJ40584                       | XM_069189         |
| 3.764     | 9.24E-13     | CCND2              | CCND2                          | NM_001759         |
| 3.751     | 6.59E-09     | IL6ST              | IL6ST                          | NM_002184         |
| 3.735     | 7.29E-11     | ATP5I              | ATP5I                          | NM_007100         |
| 3.705     | 3.14E-10     | NDUFA6             | NDUFA6                         | NM_002490         |
| 3.674     | 2.79E-14     | DGKA               | DGKA                           | NM_001345         |
| 3.658     | 8.27E-09     | NUCB2              | NUCB2                          | NM_005013         |
| 3.633     | 6.13E-07     |                    | TGFBR1                         | XM_038788         |
| 3.631     | 7.26E-14     | HSPCA              | HSPCA                          | NM_005348         |
| 3.616     | 1.58E-11     | NFATC3             | NFATC3                         | NM_004555         |
| 3.589     | 3.07E-10     | TMEM14A            | TMEM14A                        | NM_014051         |
| 3.58      | 1.96E-07     | KLRG1              | KLRG1                          | NM_005810         |
| 3.565     | 2.96E-10     | KIAA1128           | KIAA1128                       | NM_018999         |
| 3.561     | 4.08E-11     | PRKACB             | PRKACB                         | NM_002731         |

**Supplementary Table 3.** Gene expression signature defining prognostic subgroups in AAV. 1228 genes showing differential expression between subgroups 8.1 and 8.2 in a cohort of 59 AAV patients with fold-change greater than 2 and FDR-corrected p-value <0.05. Fold-change (FC) and FDR-corrected p-value (FDR p) are given for each gene along with Gene Symbol and Genbank Accession identifier.

|       |          |               |                         |           |
|-------|----------|---------------|-------------------------|-----------|
| 3.543 | 8.43E-07 | CXCR6         | CXCR6                   | NM_006564 |
| 3.542 | 1.61E-12 | PHC3          | PHC3                    | NM_024947 |
| 3.541 | 2.58E-08 | PPP1CB        | PPP1CB                  | NM_002709 |
| 3.531 | 2.47E-10 |               | #NA                     | S56526    |
| 3.529 | 1.51E-09 |               | ATM                     | HSU67093  |
| 3.526 | 2.41E-06 | GZMH          | GZMH                    | NM_033423 |
| 3.524 | 1.39E-16 | C6orf111      | DKFZp564B0769           | NM_032870 |
| 3.504 | 8.95E-13 | SF3B3         | SF3B3                   | NM_012426 |
| 3.5   | 1.54E-08 | LY9           | LY9                     | AF055708  |
| 3.492 | 4.72E-08 | PIK3R1        | PIK3R1                  | NM_181504 |
| 3.491 | 7.88E-12 | CBFB          | CBFB                    | NM_001755 |
| 3.479 | 1.39E-16 | TMP21         | TMP21                   | AA448691  |
| 3.465 | 7.20E-10 | OXCT1         | OXCT                    | NM_000436 |
| 3.459 | 7.52E-06 | CD3G          | CD3G                    | NM_000073 |
| 3.454 | 4.73E-15 | ZNF91         | ZNF91                   | NM_003430 |
| 3.44  | 7.17E-10 | C6orf62       | C6orf62                 | NM_030939 |
| 3.434 | 9.82E-16 | MRPS31        | MRPS31                  | NM_005830 |
| 3.431 | 1.69E-14 | SAP18         | SAP18                   | NM_005870 |
| 3.42  | 2.11E-10 | OGT           | OGT                     | NM_003605 |
| 3.419 | 5.67E-13 | TBL1XR1       | DC42                    | NM_030921 |
| 3.417 | 3.14E-09 | ARHGAP15      | ARHGAP15                | NM_018460 |
| 3.417 | 5.74E-11 | C6orf129      | LOC154467               | XM_166346 |
| 3.412 | 2.13E-08 | TRGC2         | TRG@                    | BC039725  |
| 3.402 | 1.95E-08 |               | KIAA0268                | XM_351341 |
| 3.392 | 8.42E-08 | MARK3         | MARK3                   | NM_002376 |
| 3.381 | 3.61E-11 | FYN           | FYN                     | NM_002037 |
| 3.378 | 5.77E-16 | C20orf104     | C20orf104               | NM_016436 |
| 3.377 | 7.29E-11 | FLJ21963      | #NA                     | AF085967  |
| 3.375 | 2.14E-16 | SF3A3         | SF3A3                   | NM_006802 |
| 3.353 | 3.30E-16 | ELF1          | ELF1                    | NM_172373 |
| 3.352 | 5.53E-08 | RBL2          | RBL2                    | NM_005611 |
| 3.345 | 3.22E-09 | GBP1          | GBP1                    | NM_002053 |
| 3.335 | 4.09E-13 | SCD4          | SCD4                    | AL831891  |
| 3.33  | 3.18E-15 | THY28         | THY28                   | NM_014174 |
| 3.317 | 7.13E-11 | PPIE          | PPIE                    | NM_006112 |
| 3.317 | 2.59E-12 | SEMA4D        | SEMA4D                  | NM_006378 |
| 3.315 | 1.37E-09 | LY9           | LY9                     | NM_002348 |
| 3.314 | 8.80E-07 | DJ328E19.C1.1 | MGC8902;FLJ20719;NOTCH2 | NM_015383 |
| 3.308 | 1.06E-11 | DDX24         | DDX24                   | NM_020414 |
| 3.304 | 2.14E-16 | COMMD2        | LOC51122                | NM_016094 |
| 3.303 | 1.11E-08 | DKFZp564C0469 | DKFZp564C0469           | AL050298  |
| 3.301 | 5.64E-13 | NUP107        | NUP107                  | NM_020401 |
| 3.283 | 4.56E-13 | SSR2          | SSR2                    | NM_003145 |
| 3.278 | 6.50E-09 | UBE2L6        | UBE2L6                  | NM_004223 |
| 3.277 | 8.55E-06 | MAST3         | KIAA0561                | XM_038150 |
| 3.275 | 2.66E-13 | FLJ20249      | FLJ20249                | XM_351302 |
| 3.27  | 2.54E-15 | RAD21         | RAD21                   | NM_006265 |
| 3.263 | 5.26E-09 | ATM           | ATM                     | NM_000051 |
| 3.26  | 2.93E-06 | HIST1H4C      | HIST1H4C                | NM_003542 |

**Supplementary Table 3.** Gene expression signature defining prognostic subgroups in AAV. 1228 genes showing differential expression between subgroups 8.1 and 8.2 in a cohort of 59 AAV patients with fold-change greater than 2 and FDR-corrected p-value <0.05. Fold-change (FC) and FDR-corrected p-value (FDR p) are given for each gene along with Gene Symbol and Genbank Accession identifier.

|       |          |                    |               |           |
|-------|----------|--------------------|---------------|-----------|
| 3.254 | 5.64E-13 | PRPF3              | HPRP3P        | NM_004698 |
| 3.247 | 1.26E-13 | ACTR6              | ACTR6         | NM_022496 |
| 3.242 | 9.55E-10 | C9orf52            | FLJ33868      | NM_152574 |
| 3.239 | 2.38E-10 | MYCPBP             | IRLB          | XM_050909 |
| 3.229 | 7.11E-09 | C1orf41            | LOC51668      | NM_016126 |
| 3.227 | 2.80E-11 | CAB39              | MO25          | AF151824  |
| 3.225 | 1.02E-09 | C3orf4             | C3orf4        | NM_019895 |
| 3.217 | 1.48E-12 | CYFIP2             | PRO1331       | NM_030778 |
| 3.216 | 1.72E-11 | FLJ20696           | FLJ10652      | NM_018169 |
| 3.216 | 1.10E-08 | DKFZP564O1664      | DKFZP564O1664 | NM_030800 |
| 3.193 | 5.39E-13 | HTATSF1            | HTATSF1       | NM_014500 |
| 3.192 | 1.53E-08 | RPL4               | RPL4          | NM_000968 |
| 3.187 | 1.56E-13 | TOP2B              | TOP2B         | NM_001068 |
| 3.18  | 2.08E-11 |                    | #NA           | AK092450  |
| 3.18  | 7.05E-08 |                    | #NA;SF3B2     | BC009445  |
| 3.173 | 3.73E-10 | DKFZP564M182       | DKFZP564M182  | AJ007398  |
| 3.173 | 2.41E-11 | KIAA1007           | KIAA1007      | NM_016284 |
| 3.15  | 3.23E-10 | UBE2V2             | UBE2V2        | NM_003350 |
| 3.148 | 6.92E-07 | PTTG1              | PTTG1         | NM_004219 |
| 3.132 | 3.22E-13 | HNRPU              | HNRPU         | NM_004501 |
| 3.117 | 1.13E-10 | MRPL51             | MRPL51        | NM_016497 |
| 3.117 | 4.15E-12 | SDCCAG1            | SDCCAG1       | AK000913  |
| 3.114 | 3.81E-14 | LARS               | LARS          | NM_020117 |
| 3.112 | 1.30E-08 | NRAS               | NRAS          | NM_002524 |
| 3.109 | 1.03E-14 | STAT4              | STAT4         | NM_003151 |
| 3.108 | 6.41E-08 | PHC3               | PHC3          | AK095225  |
| 3.106 | 2.71E-08 | TNIK               | KIAA0551      | XM_039796 |
| 3.104 | 1.53E-12 | C20orf36           | C20orf36      | NM_018257 |
| 3.093 | 5.24E-09 | C6orf195           | C6orf195      | NM_152554 |
| 3.09  | 2.20E-12 | KBTBD4             | FLJ10450      | NM_018095 |
| 3.09  | 8.60E-09 | C17orf27; KIAA1554 | KIAA1554      | XM_290768 |
| 3.088 | 6.37E-10 |                    | #NA           | M28596    |
| 3.084 | 3.71E-11 | PDE4B              | PDE4B         | NM_002600 |
| 3.081 | 2.84E-10 | LOC202459          | LOC202459     | NM_145303 |
| 3.075 | 1.39E-12 | C9orf55            | FLJ20686      | NM_017925 |
| 3.075 | 6.78E-14 | MBNL1              | MBNL1         | NM_021038 |
| 3.066 | 1.44E-07 | BBX                | BBX           | NM_020235 |
| 3.062 | 4.58E-13 | MRPL42             | MRPL42        | NM_014050 |
| 3.054 | 2.12E-11 | ABCE1              | ABCE1         | NM_002940 |
| 3.053 | 9.36E-12 | EPRS               | EPRS          | NM_004446 |
| 3.052 | 3.32E-11 | HNRPH1             | HNRPH1        | NM_005520 |
| 3.049 | 1.34E-13 | PUM2               | PUM2          | NM_015317 |
| 3.047 | 6.82E-11 | SLC3A1             | SLC3A1        | NM_000341 |
| 3.046 | 1.71E-06 | GPR171             | H963          | NM_013308 |
| 3.032 | 8.50E-10 | ZNF410             | APA1          | NM_021188 |
| 3.025 | 5.93E-07 | SH2D1A             | SH2D1A        | AF100543  |
| 3.025 | 1.54E-14 | ZNF512             | KIAA1805      | NM_032434 |
| 3.024 | 1.59E-10 | DKFZP564O0523      | DKFZP564O0523 | NM_032120 |
| 3.019 | 3.22E-14 | CIP29              | CIP29         | NM_033082 |

**Supplementary Table 3.** Gene expression signature defining prognostic subgroups in AAV. 1228 genes showing differential expression between subgroups 8.1 and 8.2 in a cohort of 59 AAV patients with fold-change greater than 2 and FDR-corrected p-value <0.05. Fold-change (FC) and FDR-corrected p-value (FDR p) are given for each gene along with Gene Symbol and Genbank Accession identifier.

|       |          |            |                    |           |
|-------|----------|------------|--------------------|-----------|
| 3.018 | 6.27E-13 | AEBP2      | AEBP2              | NM_153207 |
| 3.01  | 5.27E-09 | EIF5B      | IF2                | NM_015904 |
| 3.006 | 3.38E-09 | COX7A3     | COX7A3             | NM_183003 |
| 2.999 | 1.37E-10 | SMARCA2    | SMARCA2            | NM_139045 |
| 2.999 | 1.21E-10 | SOD1       | SOD1               | NM_000454 |
| 2.998 | 3.87E-06 | KIAA0625   | KIAA0625           | NM_015046 |
| 2.995 | 6.51E-09 |            | TRIP12             | NM_004238 |
| 2.994 | 7.98E-07 | C6orf133   | KIAA0349           | AB002347  |
| 2.991 | 2.70E-11 | PMS1       | PMS1               | NM_000534 |
| 2.99  | 7.95E-11 | DDB1       | DDB1               | NM_001923 |
| 2.987 | 2.31E-11 | MGC45400   | MGC45400           | NM_153333 |
| 2.985 | 5.61E-11 | HLC-8      | FLJ20721           | NM_017941 |
| 2.977 | 7.26E-11 | MLLT3      | MLLT3              | NM_004529 |
| 2.975 | 3.94E-09 | SEC8L1     | SEC8               | NM_021807 |
| 2.974 | 5.67E-13 | ACTL6A     | BAF53A             | NM_004301 |
| 2.974 | 1.60E-14 | EIF2B3     | EIF2B3             | NM_020365 |
| 2.971 | 8.61E-14 | KIAA1449   | KIAA1449           | NM_020839 |
| 2.969 | 1.12E-13 | PSIP1      | PSIP2              | NM_033222 |
| 2.968 | 2.08E-10 | ATP5H      | ATP5H              | NM_006356 |
| 2.966 | 8.50E-14 | DDX23      | DDX23              | NM_004818 |
| 2.964 | 7.92E-14 | NOP5/NOP58 | NOP5/NOP58         | NM_015934 |
| 2.963 | 3.34E-09 | NJMU-R1    | NJMU-R1            | NM_022344 |
| 2.961 | 4.19E-09 | UBE2H      | UBE2H              | NM_003344 |
| 2.959 | 1.28E-05 | STMN1      | STMN1              | NM_005563 |
| 2.958 | 5.01E-10 | OCIL       | LLT1               | NM_013269 |
| 2.95  | 2.73E-09 | CBLL1      | CBLL1              | NM_024814 |
| 2.95  | 9.77E-11 | PEX19      | PXF                | NM_002857 |
| 2.939 | 2.12E-11 | PRKCQ      | PRKCQ              | NM_006257 |
| 2.936 | 2.90E-10 | LOC133619  | LOC133619          | NM_130809 |
| 2.932 | 2.69E-06 | CD2        | CD2                | NM_001767 |
| 2.924 | 5.21E-12 | LOC375251  | LOC375248;KIAA1641 | AK074570  |
| 2.922 | 2.12E-11 | MRPL22     | MRPL22             | NM_014180 |
| 2.921 | 1.11E-13 | RECQL      | RECQL              | NM_002907 |
| 2.914 | 1.25E-09 | BPIL1      | BPIL1              | NM_025227 |
| 2.91  | 6.78E-09 | ALCAT1     | UNQ1849            | AK023269  |
| 2.909 | 2.95E-12 | DJ122O8.2  | DJ122O8.2          | NM_020466 |
| 2.905 | 3.59E-12 | NFATC3     | NFATC3             | NM_173164 |
| 2.901 | 1.44E-09 | TRIM22     | TRIM22             | NM_006074 |
| 2.894 | 5.28E-09 | RNF34      | RNF34              | NM_025126 |
| 2.892 | 5.89E-09 | PTPN4      | PTPN4              | NM_002830 |
| 2.889 | 2.04E-14 | MORF4L1    | MORF4L1            | NM_006791 |
| 2.888 | 1.49E-14 | KIF2       | KIF2               | NM_004520 |
| 2.887 | 3.23E-09 | MYST4      | MYST4              | AJ299262  |
| 2.887 | 0.00022  | FKSG14     | FKSG14             | NM_022145 |
| 2.886 | 8.05E-11 | CFDP1      | CFDP1              | NM_006324 |
| 2.885 | 3.81E-14 | BCAP31     | BCAP31             | NM_005745 |
| 2.878 | 3.45E-10 | ABCD2      | ABCD2              | NM_005164 |
| 2.877 | 1.93E-12 | H41        | H41                | NM_017548 |
| 2.876 | 4.36E-13 | KIAA1627   | KIAA1627           | NM_020961 |

**Supplementary Table 3.** Gene expression signature defining prognostic subgroups in AAV. 1228 genes showing differential expression between subgroups 8.1 and 8.2 in a cohort of 59 AAV patients with fold-change greater than 2 and FDR-corrected p-value <0.05. Fold-change (FC) and FDR-corrected p-value (FDR p) are given for each gene along with Gene Symbol and Genbank Accession identifier.

|       |          |                   |              |           |
|-------|----------|-------------------|--------------|-----------|
| 2.873 | 4.19E-07 | TCF7              | TCF7         | NM_003202 |
| 2.87  | 4.23E-11 | STX17             | FLJ20651     | NM_017919 |
| 2.858 | 1.85E-09 | KIAA1002; PR01365 | KIAA1002     | NM_014925 |
| 2.857 | 4.00E-11 | ANKRD12           | KIAA0874     | NM_015208 |
| 2.852 | 6.28E-10 | T3JAM             | DJ434O14.3   | NM_025228 |
| 2.849 | 3.24E-10 | PDCL              | PDCL         | NM_005388 |
| 2.848 | 2.88E-07 | BTN3A2            | BTN3A2       | NM_007047 |
| 2.842 | 2.31E-11 | AXOT              | AXOT         | NM_022826 |
| 2.841 | 1.73E-11 | PAXIP1L           | PAXIP1L      | NM_007349 |
| 2.84  | 1.14E-08 | DKFZp761G058      | DKFZp761G058 | NM_152542 |
| 2.839 | 1.46E-07 | KLRK1             | D12S2489E    | NM_007360 |
| 2.833 | 3.68E-09 | FLJ14936          | FLJ14936     | NM_032864 |
| 2.83  | 1.89E-08 |                   | #NA          | BC045794  |
| 2.825 | 1.39E-16 | C17orf25          | CGI-150      | NM_016080 |
| 2.824 | 8.82E-10 | PSMD14            | PSMD14       | BC009524  |
| 2.822 | 1.44E-09 | GBP3              | GBP3         | NM_018284 |
| 2.819 | 8.67E-07 | CRYZ              | CRYZ         | NM_001889 |
| 2.816 | 1.21E-10 |                   | HSPC056;#NA  | BC007934  |
| 2.812 | 8.61E-12 | HSA275986         | HSA275986    | NM_018403 |
| 2.81  | 6.03E-10 | PAFAH1B1          | PAFAH1B1     | NM_000430 |
| 2.808 | 4.50E-12 | ALG5              | ALG5         | NM_013338 |
| 2.807 | 1.09E-08 |                   | #NA          | AK075484  |
| 2.806 | 5.70E-07 | PDE7A             | PDE7A        | NM_002604 |
| 2.805 | 4.66E-06 | RGS1              | RGS1         | NM_002922 |
| 2.804 | 4.63E-06 | RHOH              | ARHH         | NM_004310 |
| 2.804 | 2.74E-09 | PCTK2             | PCTK2        | NM_002595 |
| 2.803 | 0.00011  | IGLV@             | IGLV@        | M12025    |
| 2.802 | 6.90E-10 | LYRIC             | LYRIC        | NM_178812 |
| 2.802 | 1.92E-07 | KIAA0226          | KIAA0226     | XM_032901 |
| 2.8   | 1.53E-12 | C6orf162          | C6orf162     | NM_020425 |
| 2.8   | 6.61E-07 | ATP6V1C2          | ATP6V1C2     | NM_144583 |
| 2.791 | 9.82E-12 | TCF8              | TCF8         | NM_030751 |
| 2.789 | 5.00E-15 | SF3A1             | PCNXL3;SF3A1 | NM_005877 |
| 2.788 | 7.11E-14 | ZNF22             | ZNF22        | NM_006963 |
| 2.782 | 1.98E-07 | SLAMF7            | CRACC        | NM_021181 |
| 2.778 | 1.45E-15 | HSPC148           | HSPC148      | NM_016403 |
| 2.776 | 6.40E-11 | CASP8             | CASP8        | NM_001228 |
| 2.774 | 4.86E-14 | CRBN              | LOC51185     | NM_016302 |
| 2.771 | 1.81E-08 | HBS1L             | HBS1L        | NM_006620 |
| 2.77  | 1.08E-12 | HSPC051           | HSPC051      | NM_013387 |
| 2.767 | 3.71E-08 | MAD2L1            | MAD2L1       | NM_002358 |
| 2.766 | 8.07E-05 | COX6C             | COX6C        | NM_004374 |
| 2.765 | 2.13E-07 | SARA2             | LOC51128     | NM_016103 |
| 2.758 | 6.60E-14 | CCT3              | CCT3         | NM_005998 |
| 2.753 | 2.75E-09 |                   | LOC375443    | XM_351608 |
| 2.752 | 5.77E-13 | DAP3              | DAP3         | NM_004632 |
| 2.751 | 4.54E-07 | ch-TOG            | ch-TOG       | NM_014756 |
| 2.75  | 5.01E-13 | FLJ13291          | FLJ13291     | NM_032178 |
| 2.749 | 2.41E-10 | EDD               | DD5          | NM_015902 |

**Supplementary Table 3.** Gene expression signature defining prognostic subgroups in AAV. 1228 genes showing differential expression between subgroups 8.1 and 8.2 in a cohort of 59 AAV patients with fold-change greater than 2 and FDR-corrected p-value <0.05. Fold-change (FC) and FDR-corrected p-value (FDR p) are given for each gene along with Gene Symbol and Genbank Accession identifier.

|       |          |              |               |           |
|-------|----------|--------------|---------------|-----------|
| 2.746 | 3.17E-11 |              | FLJ13373      | XM_352896 |
| 2.744 | 5.77E-16 | PITPNB       | PITPNB        | NM_012399 |
| 2.742 | 1.09E-11 | BTN3A3       | BTN3A1;BTN3A3 | NM_006994 |
| 2.74  | 2.36E-17 | ZNF265       | ZNF265        | NM_005455 |
| 2.738 | 5.25E-15 | CCNH         | CCNH          | NM_001239 |
| 2.738 | 6.74E-10 |              | C20orf53      | NM_178472 |
| 2.737 | 7.80E-10 | C13orf12     | C13orf12      | NM_015932 |
| 2.736 | 3.65E-09 | B4GALT3      | B4GALT3       | NM_003779 |
| 2.736 | 5.07E-13 | LOC51321     | LOC51321      | NM_016627 |
| 2.734 | 2.31E-12 | PSMD11       | PSMD11        | NM_002815 |
| 2.733 | 1.61E-09 | STARD7       | STARD7        | NM_020151 |
| 2.732 | 9.61E-13 | DDX46        | DDX46         | NM_014829 |
| 2.732 | 4.60E-13 | NUCKS        | NUCKS         | NM_022731 |
| 2.731 | 1.58E-11 | SKP1A        | SKP1A         | NM_006930 |
| 2.723 | 2.16E-07 | MBP          | MBP           | BC030093  |
| 2.722 | 6.12E-10 | CCT8         | CCT8          | NM_006585 |
| 2.722 | 1.12E-09 | MBC2         | MBC2          | NM_015292 |
| 2.715 | 1.01E-05 | MGC61571     | MGC61571      | NM_182523 |
| 2.714 | 2.30E-09 | C21orf51     | C21orf51      | NM_058182 |
| 2.713 | 2.95E-12 | MTAC2D1      | MTAC2D1       | NM_152332 |
| 2.712 | 4.82E-12 | CAB39        | MO25          | NM_016289 |
| 2.707 | 4.97E-08 | ZNF337       | ZNF337        | NM_015655 |
| 2.704 | 1.74E-09 | MI-ER1       | MI-ER1        | NM_020948 |
| 2.704 | 2.76E-10 | ACSL5        | FACL5;ACSL5   | NM_016234 |
| 2.703 | 1.96E-13 | HDAC1        | HDAC1         | NM_004964 |
| 2.702 | 7.87E-10 | STX8         | STX8          | NM_004853 |
| 2.701 | 2.37E-06 | MSN          | MSN           | NM_002444 |
| 2.697 | 3.30E-12 | MBNL1        | MBNL1         | BC005296  |
| 2.69  | 1.08E-06 | EG1          | EG1           | AK024944  |
| 2.685 | 4.09E-13 | ELYS         | ELYS          | NM_015446 |
| 2.68  | 2.77E-09 | MRPL1        | MRPL1         | NM_020236 |
| 2.678 | 3.73E-10 | SUPT16H      | SUPT16H       | NM_007192 |
| 2.676 | 2.56E-09 | HCNGP        | HCNGP         | NM_013260 |
| 2.673 | 2.08E-09 | MRPL48       | MRPL48        | NM_016055 |
| 2.671 | 9.74E-09 | VRK1         | VRK1          | NM_003384 |
| 2.667 | 1.20E-15 | DKFZp564K142 | DKFZp564K142  | NM_032121 |
| 2.666 | 4.28E-08 | PAK2         | PAK2          | AF092132  |
| 2.666 | 1.29E-14 |              | #NA           | HSMR3     |
| 2.664 | 9.23E-09 | CCT2         | CCT2          | NM_006431 |
| 2.662 | 4.58E-13 | TAF9L        | TAF9L         | NM_015975 |
| 2.66  | 1.04E-09 | RANBP2       | RANBP2        | NM_006267 |
| 2.649 | 4.45E-11 | LOC57117     | LOC57117      | NM_020395 |
| 2.649 | 3.22E-13 | MTRF1        | MTRF1         | BC027731  |
| 2.647 | 6.07E-17 | FMR1         | FMR1          | NM_002024 |
| 2.644 | 6.78E-14 | SCYE1        | SCYE1         | NM_004757 |
| 2.64  | 5.07E-13 | LOC94431     | RRN3;LOC94431 | NM_145237 |
| 2.638 | 1.44E-10 | FLJ38968     | FLJ38968      | NM_152316 |
| 2.637 | 1.30E-05 | GZMA         | GZMA          | NM_006144 |
| 2.63  | 1.41E-06 | EIF3S6       | EIF3S6        | NM_001568 |



**Supplementary Table 3.** Gene expression signature defining prognostic subgroups in AAV. 1228 genes showing differential expression between subgroups 8.1 and 8.2 in a cohort of 59 AAV patients with fold-change greater than 2 and FDR-corrected p-value <0.05. Fold-change (FC) and FDR-corrected p-value (FDR p) are given for each gene along with Gene Symbol and Genbank Accession identifier.

|       |          |           |              |           |
|-------|----------|-----------|--------------|-----------|
| 2.629 | 2.61E-10 | SC4MOL    | SC4MOL       | NM_006745 |
| 2.627 | 4.62E-13 | KCTD13    | PDIP1        | NM_178863 |
| 2.625 | 4.45E-05 | ITM2A     | ITM2A        | NM_004867 |
| 2.625 | 1.24E-10 | MGC24132  | MGC24132     | NM_152396 |
| 2.624 | 6.49E-09 | MRPL27    | MRPL27       | NM_016504 |
| 2.622 | 7.51E-11 | C18orf17  | FLJ33761     | AF363068  |
| 2.622 | 2.39E-08 | TAF1      | TAF1         | AL713702  |
| 2.619 | 1.01E-07 |           | #NA          | AK023329  |
| 2.619 | 1.10E-08 | POGZ      | POGZ         | NM_015100 |
| 2.618 | 5.84E-09 | ACLY      | ACLY         | NM_001096 |
| 2.617 | 2.11E-07 | FLJ10359  | FLJ10359     | AK095692  |
| 2.615 | 3.73E-05 | AHNAK     | MGC5395      | X74818    |
| 2.613 | 7.48E-13 | CSE1L     | CSE1L        | NM_001316 |
| 2.613 | 1.00E-07 | PCNA      | PCNA         | NM_002592 |
| 2.613 | 3.18E-08 | NIPBL     | IDN3         | NM_015384 |
| 2.612 | 3.96E-09 | COG5      | COG5         | NM_006348 |
| 2.612 | 2.23E-09 | CDC14A    | CDC14A       | NM_003672 |
| 2.611 | 2.76E-10 | SNRPB2    | SNRPB2       | NM_003092 |
| 2.609 | 8.50E-10 | USP1      | USP1         | NM_003368 |
| 2.605 | 3.42E-11 | C14orf123 | C14orf123    | NM_014169 |
| 2.605 | 2.06E-12 | ERBP      | HSU15552     | NM_014597 |
| 2.605 | 4.09E-13 | YME1L1    | YME1L1       | NM_014263 |
| 2.603 | 9.27E-07 | LPXN      | LPXN         | NM_004811 |
| 2.599 | 3.33E-11 |           | ACYP1        | XM_352906 |
| 2.598 | 7.35E-09 |           | #NA          | AF143872  |
| 2.596 | 7.79E-15 | Ufc1      | HSPC155      | NM_016406 |
| 2.596 | 1.59E-07 | FLJ35036  | FLJ22332     | XM_172341 |
| 2.595 | 1.03E-09 | ASCC3L1   | U5-200KD     | NM_014014 |
| 2.595 | 2.46E-06 | APOL3     | APOL3        | NM_014349 |
| 2.592 | 1.03E-12 | TTC3      | TTC3         | NM_003316 |
| 2.591 | 1.06E-08 | ADH5      | ADH5         | NM_000671 |
| 2.591 | 6.67E-11 | PSMD10    | PSMD10       | NM_002814 |
| 2.588 | 1.54E-07 | SIMP      | SIMP         | NM_178862 |
| 2.587 | 1.39E-08 | LYRIC     | LYRIC        | N92734    |
| 2.586 | 6.27E-09 | IAN4L1    | IAN4L1       | NM_018384 |
| 2.584 | 2.19E-10 | CYFIP2    | CYFIP2       | NM_014376 |
| 2.583 | 4.01E-08 | Rif1      | DKFZP434D193 | AK074349  |
| 2.582 | 2.41E-10 | CUL4A     | CUL4A        | NM_003589 |
| 2.58  | 1.45E-06 | SYNCRIP   | NSAP1        | NM_006372 |
| 2.579 | 1.03E-09 | C20orf45  | C20orf45     | NM_016045 |
| 2.577 | 1.80E-09 | U1SNRNPBP | U1SNRNPBP    | NM_007020 |
| 2.576 | 1.93E-12 | DOCK11    | FLJ32122     | NM_144658 |
| 2.575 | 1.09E-08 | SLC4A7    | SLC4A7       | NM_003615 |
| 2.573 | 9.62E-14 | UBE2V1    | UBE2V1       | NM_003349 |
| 2.571 | 8.12E-10 | HSPC128   | HSPC128      | NM_014167 |
| 2.57  | 1.15E-11 | FLJ20035  | FLJ20035     | NM_017631 |
| 2.569 | 1.92E-07 | SIAT4A    | LOC286167    | BX537506  |
| 2.568 | 4.77E-09 | PCF11     | PCF11        | NM_015885 |
| 2.568 | 3.20E-10 |           | PAG          | AK095177  |

**Supplementary Table 3.** Gene expression signature defining prognostic subgroups in AAV. 1228 genes showing differential expression between subgroups 8.1 and 8.2 in a cohort of 59 AAV patients with fold-change greater than 2 and FDR-corrected p-value <0.05. Fold-change (FC) and FDR-corrected p-value (FDR p) are given for each gene along with Gene Symbol and Genbank Accession identifier.

|       |          |             |              |           |
|-------|----------|-------------|--------------|-----------|
| 2.567 | 2.46E-07 | INPP4B      | INPP4B       | NM_003866 |
| 2.567 | 3.59E-11 | C13orf24    | PIBF1        | NM_006346 |
| 2.566 | 1.14E-10 |             | FLJ20220     | XM_352946 |
| 2.564 | 9.98E-11 | MRPL45      | MRPL45       | NM_032351 |
| 2.562 | 2.76E-09 | MLLT10      | MLLT10       | NM_004641 |
| 2.562 | 9.02E-08 | ATF2        | ATF2         | NM_001880 |
| 2.562 | 3.43E-11 | RAD51C      | RAD51C       | NM_002876 |
| 2.555 | 1.93E-09 | RAD54B      | RAD54B       | NM_006550 |
| 2.553 | 2.55E-10 | UBXD2       | UBXD2        | NM_014607 |
| 2.553 | 1.00E-12 | RBM25       | S164         | XM_027330 |
| 2.547 | 4.65E-11 | CDC23       | CDC23        | NM_004661 |
| 2.547 | 1.23E-05 | FLJ30656    | FLJ30656     | NM_152344 |
| 2.547 | 7.57E-06 | RPS3        | RPS3         | NM_001005 |
| 2.547 | 7.37E-08 | TFRC        | TFRC         | NM_003234 |
| 2.547 | 9.49E-15 | TAF9        | TAF9         | NM_003187 |
| 2.547 | 7.25E-10 |             | #NA          | BC015512  |
| 2.546 | 1.26E-09 | RBMX        | RBMX         | NM_002139 |
| 2.545 | 2.34E-12 | BAG5        | BAG5         | NM_004873 |
| 2.542 | 2.84E-08 | STK38       | STK38        | NM_007271 |
| 2.54  | 1.10E-08 | UMP-CMPK    | UMP-CMPK     | NM_016308 |
| 2.539 | 1.16E-10 | BANF1       | BANF1        | NM_003860 |
| 2.537 | 3.71E-10 | ATRX        | ATRX         | NM_000489 |
| 2.536 | 1.49E-07 | AFURS1      | FLJ20986     | NM_024524 |
| 2.535 | 2.91E-08 | ITGA6       | ITGA6        | NM_000210 |
| 2.535 | 3.69E-07 | NASP        | NASP         | NM_002482 |
| 2.535 | 3.30E-12 | HRB2        | HRB2         | NM_007043 |
| 2.534 | 5.72E-09 | ARTS-1      | ARTS-1       | NM_016442 |
| 2.533 | 2.57E-10 | GOSR2       | GOSR2        | NM_004287 |
| 2.532 | 5.14E-08 | ANKRD17     | GTAR;ANKRD17 | NM_032217 |
| 2.529 | 5.02E-07 | FKSG42      | FKSG42       | NM_032032 |
| 2.528 | 3.33E-11 | HNRPC       | HNRPC        | NM_004500 |
| 2.527 | 5.83E-15 | C9orf80     | HSPC043      | NM_021218 |
| 2.527 | 2.74E-11 | H2AFV       | .            | NM_138635 |
| 2.525 | 5.98E-10 | MKI67IP     | MKI67IP      | NM_032390 |
| 2.525 | 1.77E-11 | Zep-2       | KIAA1221     | NM_032186 |
| 2.524 | 2.26E-09 | FBXO3       | FBXO3        | NM_033406 |
| 2.524 | 2.94E-08 | MAP3K7IP2   | MAP3K7IP2    | NM_015093 |
| 2.523 | 4.11E-10 | RAP140      | RAP140       | NM_015224 |
| 2.519 | 1.05E-07 | IREB2       | IREB2        | XM_039114 |
| 2.519 | 1.02E-09 | LOC133957   | LOC133957    | NM_145265 |
| 2.516 | 3.87E-05 | HRMT1L1     | HRMT1L1      | NM_001535 |
| 2.514 | 1.10E-06 | SOS1        | SOS1         | NM_005633 |
| 2.514 | 2.21E-14 | RIP         | MGC4189      | NM_032308 |
| 2.512 | 4.48E-10 | BCLAF1      | BTF          | NM_014739 |
| 2.51  | 1.12E-11 | RAD9B       | RAD9B        | NM_152442 |
| 2.507 | 7.31E-12 | PTPN22      | PTPN22       | NM_015967 |
| 2.504 | 2.14E-08 | C14orf32    | C14orf32     | NM_144578 |
| 2.504 | 2.09E-08 | MYCPBP      | IRLB         | AK091368  |
| 2.503 | 1.22E-07 | CHD9; AD013 | BC022889     | AF150735  |

**Supplementary Table 3.** Gene expression signature defining prognostic subgroups in AAV. 1228 genes showing differential expression between subgroups 8.1 and 8.2 in a cohort of 59 AAV patients with fold-change greater than 2 and FDR-corrected p-value <0.05. Fold-change (FC) and FDR-corrected p-value (FDR p) are given for each gene along with Gene Symbol and Genbank Accession identifier.

|       |          |           |             |           |
|-------|----------|-----------|-------------|-----------|
| 2.5   | 5.68E-08 | FALZ      | FALZ        | NM_004459 |
| 2.498 | 6.32E-08 | POLR1C    | POLR1C      | NM_004875 |
| 2.497 | 3.54E-08 | RBM6      | RBM6        | NM_005777 |
| 2.495 | 1.19E-08 | SDCCAG33  | SDCCAG33    | NM_005786 |
| 2.495 | 7.50E-11 | C6orf32   | C6orf32     | NM_015864 |
| 2.494 | 1.48E-12 | MRPS9     | MRPS9       | NM_182640 |
| 2.492 | 5.50E-11 | SP192     | SP192       | NM_021639 |
| 2.492 | 6.70E-10 | LOC85865  | LOC85865    | NM_033107 |
| 2.492 | 8.39E-08 | C7orf6    | FLJ39885    | NM_152703 |
| 2.49  | 4.08E-11 | EBAG9     | EBAG9       | NM_004215 |
| 2.49  | 1.34E-13 | BRD8      | BRD8        | NM_006696 |
| 2.49  | 1.43E-11 | FLJ20487  | FLJ20487    | NM_017841 |
| 2.489 | 1.16E-05 | BTLA      | BTLA        | NM_181780 |
| 2.487 | 5.52E-11 | GART      | GART        | AF008655  |
| 2.484 | 1.62E-11 | STK17B    | STK17B      | NM_004226 |
| 2.484 | 1.12E-13 | KIAA0663  | .           | NM_014827 |
| 2.484 | 3.17E-11 | SORL1     | SORL1       | NM_003105 |
| 2.483 | 8.71E-10 | RNASEL    | RNASEL      | NM_021133 |
| 2.481 | 2.69E-07 | ATR       | ATR         | NM_001184 |
| 2.479 | 2.93E-10 | MKLN1     | MKLN1       | NM_013255 |
| 2.477 | 5.77E-13 | USP16     | USP16       | NM_006447 |
| 2.476 | 2.38E-09 |           | FLJ10381    | NM_018080 |
| 2.475 | 5.63E-08 | ADAR      | ADAR        | NM_001111 |
| 2.474 | 8.49E-13 | SMAP      | SMAP        | NM_014267 |
| 2.473 | 5.45E-07 | PRKR      | PRKR        | NM_002759 |
| 2.469 | 3.80E-09 | HRPT2     | C1orf28     | NM_024529 |
| 2.468 | 1.52E-08 | PHF6      | PHF6        | NM_032335 |
| 2.465 | 1.22E-10 | SRPK1     | SRPK1       | NM_003137 |
| 2.464 | 3.17E-11 | HP1-BP74  | HP1-BP74    | NM_016287 |
| 2.461 | 1.08E-10 | RBBP7     | RBBP7       | NM_002893 |
| 2.461 | 3.68E-10 | LOC151534 | LOC151534   | NM_138482 |
| 2.458 | 5.82E-09 | KIAA0746  | KIAA0746    | XM_045277 |
| 2.457 | 7.41E-08 | TA-PP2C   | TA-PP2C     | NM_139283 |
| 2.455 | 3.17E-11 | PARK7     | PARK7       | NM_007262 |
| 2.451 | 6.69E-09 | PRKCBP1   | PRKCBP1     | AA480906  |
| 2.451 | 2.00E-09 | CENTD1    | CENTD1      | NM_015230 |
| 2.449 | 1.64E-08 | RWDD3     | RWDD3       | NM_015485 |
| 2.448 | 9.39E-11 |           | UREB1       | NM_031407 |
| 2.447 | 1.26E-09 | ARMC8     | HSPC056;#NA | NM_014154 |
| 2.445 | 2.65E-10 | TPR       | TPR         | NM_003292 |
| 2.444 | 5.79E-11 | FLJ10154  | .           | NM_018011 |
| 2.444 | 2.47E-06 |           | MRPL47      | AF285120  |
| 2.443 | 2.27E-08 | MGC14288  | MGC14288    | NM_032901 |
| 2.443 | 8.00E-13 | FLJ31153  | FLJ31153    | NM_144600 |
| 2.442 | 2.02E-09 | DDX17     | KDEL3       | BC029553  |
| 2.44  | 6.09E-13 | TMF1      | TMF1        | NM_007114 |
| 2.44  | 1.72E-09 | BZW1      | BZW1        | NM_014670 |
| 2.439 | 1.89E-08 | GBP2      | GBP2        | NM_004120 |
| 2.439 | 6.09E-10 | NOD27     | NOD27       | AK090439  |

**Supplementary Table 3.** Gene expression signature defining prognostic subgroups in AAV. 1228 genes showing differential expression between subgroups 8.1 and 8.2 in a cohort of 59 AAV patients with fold-change greater than 2 and FDR-corrected p-value <0.05. Fold-change (FC) and FDR-corrected p-value (FDR p) are given for each gene along with Gene Symbol and Genbank Accession identifier.

|       |          |                                        |               |           |
|-------|----------|----------------------------------------|---------------|-----------|
| 2.437 | 2.74E-08 | RAB7L1                                 | RAB7L1        | NM_003929 |
| 2.435 | 3.97E-08 |                                        | TCR           | HSY15200  |
| 2.432 | 3.23E-10 | TCERG1                                 | TCERG1        | NM_006706 |
| 2.432 | 1.15E-12 | ZNF258                                 | ZNF258        | BC029439  |
| 2.431 | 8.29E-10 | PILRB                                  | PILRB         | NM_013440 |
| 2.431 | 2.55E-09 | PHIP                                   | PHIP          | NM_017934 |
| 2.431 | 5.12E-07 |                                        | #NA           | HSU52054  |
| 2.429 | 5.73E-13 | COL5A2                                 | COL5A2        | NM_000393 |
| 2.428 | 3.31E-07 | NAP1L1                                 | NAP1L1        | NM_004537 |
| 2.427 | 1.64E-07 | TRIP3                                  | TRIP3         | NM_004773 |
| 2.425 | 2.73E-09 | KIAA0553                               | KIAA0553      | XM_290758 |
| 2.423 | 8.64E-10 | AE2                                    | DKFZp434D177  | NM_032264 |
| 2.422 | 1.28E-09 | CETN3                                  | CETN3         | NM_004365 |
| 2.422 | 7.87E-10 | TDE1                                   | TDE1          | NM_006811 |
| 2.421 | 1.97E-09 | CREB1                                  | CREB1         | NM_004379 |
| 2.42  | 1.21E-06 | POLR3K                                 | POLR3K        | NM_016310 |
| 2.419 | 7.92E-14 | SEPT15;SEP15                           | SEPT15;SEP15  | NM_004261 |
| 2.419 | 1.08E-05 | TACC1                                  | TACC1         | NM_006283 |
| 2.419 | 3.24E-10 | FLJ38663                               | FLJ38663      | NM_152269 |
| 2.417 | 3.59E-12 | SFRS2                                  | SFRS2         | NM_003016 |
| 2.417 | 1.07E-10 | BCCIP                                  | BCCIP         | NM_016567 |
| 2.415 | 5.79E-09 | MGC21654                               | MGC21654      | NM_145647 |
| 2.415 | 2.91E-05 | MCM7                                   | MCM7          | NM_005916 |
| 2.413 | 4.18E-05 | IFITM1                                 | .             | NM_003641 |
| 2.409 | 8.56E-08 | VBP1                                   | VBP1          | NM_003372 |
| 2.407 | 8.80E-10 | HIBCH                                  | HIBCH         | NM_014362 |
| 2.407 | 2.88E-10 | NSUN4                                  | FAAH;MGC22960 | BC016907  |
| 2.405 | 1.86E-10 | ERCC5                                  | ERCC5         | NM_000123 |
| 2.405 | 1.44E-10 | GNAS                                   | GNAS          | NM_000516 |
| 2.404 | 1.19E-05 | MGC19764                               | MGC19764      | NM_144975 |
| 2.403 | 1.85E-09 | PARP1                                  | C12orf6       | NM_020367 |
| 2.403 | 3.20E-11 | FARSLB                                 | FRSB          | NM_005687 |
| 2.402 | 3.43E-10 | NONO                                   | NONO          | NM_007363 |
| 2.402 | 4.45E-08 | KIAA0090                               | KIAA0090      | NM_015047 |
| 2.4   | 7.21E-08 |                                        | #NA           | AF052160  |
| 2.399 | 1.95E-08 | PPP3CA                                 | PPP3CA        | NM_000944 |
| 2.396 | 7.13E-11 | AKAP11                                 | AKAP11        | NM_016248 |
| 2.394 | 8.37E-08 | GNA13                                  | GNA13         | NM_006572 |
| 2.394 | 1.43E-07 | FLJ31033                               | FLJ31033      | XM_037817 |
| 2.393 | 8.50E-09 | ATAD1                                  | FLJ14600      | NM_032810 |
| 2.392 | 1.42E-08 | GALC                                   | GALC          | U77631    |
| 2.392 | 1.47E-08 | SMC4L1                                 | SMC4L1        | NM_005496 |
| 2.39  | 4.34E-09 |                                        | LOC350498     | BC018088  |
| 2.387 | 4.60E-10 | BIRC6                                  | BIRC6         | NM_016252 |
| 2.386 | 3.59E-12 | SLC7A6; LAT3; LAT-2; y+LAT-2; KIAA0245 | SLC7A6        | NM_003983 |
| 2.385 | 1.86E-09 | KNTC1                                  | KNTC1         | NM_014708 |
| 2.385 | 2.84E-10 | FLJ22028                               | FLJ22028      | NM_024854 |

**Supplementary Table 3.** Gene expression signature defining prognostic subgroups in AAV. 1228 genes showing differential expression between subgroups 8.1 and 8.2 in a cohort of 59 AAV patients with fold-change greater than 2 and FDR-corrected p-value <0.05. Fold-change (FC) and FDR-corrected p-value (FDR p) are given for each gene along with Gene Symbol and Genbank Accession identifier.

|       |          |           |           |                     |
|-------|----------|-----------|-----------|---------------------|
| 2.384 | 1.04E-11 | C20orf13  | C20orf13  | NM_017714           |
| 2.384 | 3.09E-12 | COX7A2    | COX7A2    | NM_001865           |
| 2.384 | 3.79E-14 | SON       | SON       | NM_032195           |
| 2.383 | 1.20E-12 | SHFM1     | SHFM1     | NM_006304           |
| 2.382 | 1.51E-10 | UBE1C     | UBE1C     | NM_003968           |
| 2.381 | 4.61E-09 | KCMF1     | KCMF1     | NM_020122           |
| 2.381 | 1.48E-12 | RPN2      | RPN2      | NM_002951           |
| 2.38  | 4.77E-07 | TXK       | TXK       | NM_003328           |
| 2.378 | 5.72E-07 | MGEA5     | MGEA5     | NM_012215           |
| 2.378 | 2.90E-09 | FLJ25005  | FLJ25005  | NM_152334           |
| 2.377 | 2.98E-09 | HIF1A     | HIF1A     | NM_001530           |
| 2.376 | 1.69E-09 | SMU1      | SMU-1     | NM_018225           |
| 2.375 | 9.97E-10 | PSMA3     | PSMA3     | NM_002788           |
| 2.375 | 4.90E-09 | LOC257106 | LOC257106 | NM_181720           |
| 2.374 | 3.21E-10 | DCTN6     | DCTN6     | NM_006571           |
| 2.369 | 6.16E-05 | CHI3L2    | CHI3L2    | NM_004000           |
| 2.369 | 9.29E-11 | XBP1      | XBP1      | NM_005080           |
| 2.368 | 0.00247  | IGLV@     | IGL       | AF047240            |
| 2.368 | 9.44E-10 | MIS12     | MIS12     | NM_024039           |
| 2.368 | 2.72E-06 | PAN3      | LOC255967 | NM_175854           |
| 2.366 | 1.88E-10 | ZNF638    | NP220     | NM_014497           |
| 2.366 | 7.28E-12 | XRCC5     | XRCC5     | NM_021141           |
| 2.365 | 1.39E-06 | PFDN4     | PFDN4     | NM_002623           |
| 2.363 | 5.01E-13 | IARS      | IARS      | NM_013417;NM_002161 |
| 2.362 | 2.09E-07 | CSNK2A1   | CSNK2A1   | NM_001895           |
| 2.361 | 1.82E-09 | C20orf9   | C20orf9   | NM_016004           |
| 2.361 | 5.08E-12 | FOXP1     | FOXP1     | NM_032682           |
| 2.358 | 3.64E-14 | DC2       | DC2       | NM_021227           |
| 2.357 | 8.85E-08 | LOC151963 | LOC151963 | NM_178496           |
| 2.357 | 6.34E-06 | CCNE2     | CCNE2     | NM_004702           |
| 2.355 | 1.37E-07 | HSPE1     | HSPE1     | NM_002157           |
| 2.354 | 1.97E-09 | NSEP1     | NSEP1     | NM_004559           |
| 2.354 | 3.12E-06 | UBAP1     | UBAP1     | NM_016525           |
| 2.353 | 3.42E-09 | TRIP15    | TRIP15    | NM_004236           |
| 2.353 | 3.84E-13 | NFX1      | NFX1      | NM_147133           |
| 2.352 | 4.15E-12 | EEF1E1    | EEF1E1    | NM_004280           |
| 2.351 | 1.16E-11 | TAF12     | TAF12     | NM_005644           |
| 2.351 | 1.17E-10 | C5orf3    | C5orf3    | NM_018691           |
| 2.349 | 1.52E-05 | ACSL6     | FACL6     | NM_015256           |
| 2.349 | 5.87E-11 | RAPGEF6   | PDZGEF2   | NM_016340           |
| 2.349 | 1.02E-05 | USP28     | USP28     | NM_020886           |
| 2.348 | 1.01E-09 | C5orf5    | C5orf5    | NM_016603           |
| 2.347 | 5.03E-09 | RBBP6     | RBBP6     | NM_006910           |
| 2.347 | 2.99E-12 | SEC31L1   | KIAA0905  | NM_014933           |
| 2.345 | 4.48E-15 | POP5      | POP5      | NM_015918           |
| 2.345 | 2.55E-10 | GNB1      | GNB1      | NM_002074           |
| 2.345 | 5.09E-08 | RBM4      | RBM4      | NM_002896           |
| 2.342 | 6.50E-12 | TGDS      | TGDS      | NM_014305           |

**Supplementary Table 3.** Gene expression signature defining prognostic subgroups in AAV. 1228 genes showing differential expression between subgroups 8.1 and 8.2 in a cohort of 59 AAV patients with fold-change greater than 2 and FDR-corrected p-value <0.05. Fold-change (FC) and FDR-corrected p-value (FDR p) are given for each gene along with Gene Symbol and Genbank Accession identifier.

|       |          |           |               |           |
|-------|----------|-----------|---------------|-----------|
| 2.342 | 2.40E-09 | HMG20A    | HMG20A        | NM_018200 |
| 2.339 | 2.68E-10 |           | KIAA1411      | NM_020819 |
| 2.337 | 9.49E-15 | TDP1      | TDP1          | NM_018319 |
| 2.337 | 1.34E-13 | FAM18B    | FAM18B        | NM_016078 |
| 2.336 | 9.00E-07 |           | FLJ31131      | NM_152535 |
| 2.335 | 9.51E-09 | BPNT1     | BPNT1         | NM_006085 |
| 2.335 | 6.36E-09 | KIAA1219  | KIAA1219      | XM_028835 |
| 2.334 | 9.86E-11 | APG12L    | APG12L        | NM_004707 |
| 2.334 | 1.58E-11 | TLK1      | TLK1          | NM_012290 |
| 2.334 | 4.29E-11 | TIP120A   | TIP120A       | NM_018448 |
| 2.333 | 9.33E-08 |           | KIAA0100      | XM_351114 |
| 2.333 | 1.36E-07 | KIAA1160  | KIAA1160      | NM_020701 |
| 2.332 | 2.60E-11 | C6orf75   | MDS024        | NM_021820 |
| 2.331 | 5.89E-07 | FLJ23577  | FLJ23577;KPL2 | NM_144722 |
| 2.33  | 7.68E-05 | na        | LOC197135     | XM_113825 |
| 2.329 | 1.03E-07 | C14orf129 | C14orf129     | NM_016472 |
| 2.328 | 2.40E-09 | EPC1      | EPC1          | NM_025209 |
| 2.328 | 1.19E-07 | FLJ32942  | FLJ32942      | NM_144594 |
| 2.327 | 2.25E-06 | NCOA3     | NCOA3         | NM_006534 |
| 2.327 | 1.29E-10 | BAPX1     | BAPX1         | NM_001189 |
| 2.327 | 1.51E-09 | BTN2A1    | BTN2A1        | NM_007049 |
| 2.326 | 2.20E-10 | KIAA0052  | KIAA0052      | NM_015360 |
| 2.322 | 4.62E-07 | CNAP1     | CNAP1         | NM_014865 |
| 2.322 | 2.15E-08 |           | LOC284580     | AK094426  |
| 2.322 | 1.85E-05 | CREBL1    | CREBL1        | NM_004381 |
| 2.321 | 2.39E-08 | AP3M2     | AP3M2         | NM_006803 |
| 2.321 | 6.34E-10 | LOC401152 | LOC344984     | BC017399  |
| 2.321 | 9.25E-13 | DLD       | DLD           | NM_000108 |
| 2.32  | 5.28E-09 | TBL1XR1   | IRA1          | NM_024665 |
| 2.319 | 1.06E-11 | DBI       | DBI           | NM_020548 |
| 2.317 | 8.30E-08 | SLK       | SLK           | NM_014720 |
| 2.316 | 3.17E-11 | CDC10     | CDC10         | NM_001788 |
| 2.316 | 1.21E-08 | PRKCB1    | PRKCB1        | NM_002738 |
| 2.314 | 9.66E-12 | SDCCAG1   | SDCCAG1       | NM_004713 |
| 2.312 | 1.83E-09 | KIFAP3    | KIFAP3        | NM_014970 |
| 2.312 | 6.07E-07 |           | C14orf61      | NM_177527 |
| 2.31  | 5.67E-13 | ERH       | ERH           | NM_004450 |
| 2.309 | 0.00010  | BAL       | BAL           | NM_031458 |
| 2.309 | 5.21E-12 | RANBP5    | KPNB3         | NM_002271 |
| 2.307 | 3.48E-07 | PTTG2     | PTTG2         | NM_006607 |
| 2.305 | 2.02E-11 |           | FLJ20343      | BF667436  |
| 2.304 | 5.33E-09 | RNF19     | RNF19         | NM_015435 |
| 2.304 | 7.52E-08 | COH1      | COH1          | NM_152564 |
| 2.303 | 1.83E-09 | CBX5      | CBX5          | NM_012117 |
| 2.302 | 1.09E-08 | ZNFN1A5   | PEGASUS       | NM_022466 |
| 2.301 | 9.00E-11 | MGC3794   | MGC3794       | NM_152902 |
| 2.301 | 3.73E-08 | ARNT      | ARNT          | NM_001668 |
| 2.299 | 1.02E-07 | STK16     | STK16         | NM_003691 |

**Supplementary Table 3.** Gene expression signature defining prognostic subgroups in AAV. 1228 genes showing differential expression between subgroups 8.1 and 8.2 in a cohort of 59 AAV patients with fold-change greater than 2 and FDR-corrected p-value <0.05. Fold-change (FC) and FDR-corrected p-value (FDR p) are given for each gene along with Gene Symbol and Genbank Accession identifier.

|       |          |                                                        |                  |           |
|-------|----------|--------------------------------------------------------|------------------|-----------|
| 2.299 | 2.06E-07 |                                                        | HIC              | AF054589  |
| 2.298 | 1.70E-11 | SLC38A1                                                | SLC38A1          | NM_030674 |
| 2.298 | 1.04E-05 | PIP5K2C                                                | PIP5K2C          | NM_024779 |
| 2.298 | 4.70E-07 | FLJ13231                                               | FLJ13231         | NM_023073 |
| 2.296 | 2.02E-08 | OSGEPL1                                                | OSGEPL1          | NM_022353 |
| 2.296 | 6.56E-10 | DKFZP434I116                                           | DKFZP434I116     | NM_015496 |
| 2.295 | 4.56E-06 | MAP4K5                                                 | MAP4K5           | NM_006575 |
| 2.295 | 3.36E-08 | MGC39518                                               | MGC39518         | NM_173822 |
| 2.293 | 1.21E-10 | SET                                                    | SET              | NM_003011 |
| 2.291 | 8.29E-10 | PLEKHK1                                                | RTKN2            | NM_145307 |
| 2.29  | 2.72E-08 | MGC13272                                               | MGC13272         | NM_032355 |
| 2.285 | 7.69E-12 | PLRG1                                                  | PLRG1            | NM_002669 |
| 2.285 | 1.23E-09 | C14orf108                                              | C14orf108        | NM_018229 |
| 2.285 | 4.30E-08 | DDX6                                                   | DDX6             | AK021715  |
| 2.284 | 2.65E-10 | LOC123169                                              | LOC123169        | NM_138792 |
| 2.283 | 1.59E-09 | ELOVL3                                                 | ELOVL3           | NM_152310 |
| 2.282 | 4.47E-08 | KIAA2010                                               | FLJ20707         | NM_017936 |
| 2.281 | 2.50E-06 | DSCR5                                                  | DSCR5            | NM_016430 |
| 2.28  | 0.00064  | IGKC                                                   | IGKC             | L12091    |
|       | 6        |                                                        |                  |           |
| 2.279 | 8.82E-10 | RSU1                                                   | RSU1             | NM_012425 |
| 2.279 | 1.16E-05 |                                                        | #NA              | AA625894  |
| 2.279 | 1.09E-08 |                                                        | KIAA1277         | XM_353688 |
| 2.278 | 8.68E-07 | C6orf106                                               | MGC4614;FLJ22195 | NM_022758 |
| 2.276 | 1.62E-08 | ZNF292                                                 | ZNF292           | AK023626  |
| 2.272 | 1.28E-10 | PRKCH; PKCL; PKC-L; PRKCL; MGC5363; MGC26269; nPKC-eta | PRKCH            | S74620    |
| 2.271 | 8.49E-09 | JARID1A                                                | RBBP2            | NM_005056 |
| 2.271 | 0.00089  |                                                        | #NA              | AF058068  |
|       | 4        |                                                        |                  |           |
| 2.27  | 1.10E-08 | CCDC5                                                  | LOC115106        | NM_138443 |
| 2.27  | 4.23E-12 | POLR2B                                                 | POLR2B           | NM_000938 |
| 2.27  | 9.82E-09 | AARS                                                   | AARS             | NM_001605 |
| 2.27  | 2.05E-08 | PIGF                                                   | PIGF             | NM_002643 |
| 2.269 | 1.03E-09 | LOC54499                                               | LOC54499         | NM_019026 |
| 2.268 | 2.26E-10 | FLJ10637                                               | FLJ10637         | NM_018164 |
| 2.268 | 3.12E-10 | MGC33371                                               | MGC33371         | NM_144664 |
| 2.266 | 1.02E-07 | ANKRD10                                                | ANKRD10          | NM_017664 |
| 2.266 | 0.00011  | SIAT4A                                                 | SIAT4A           | NM_003033 |
|       | 9        |                                                        |                  |           |
| 2.266 | 1.33E-10 | CDR2                                                   | CDR2             | XM_071866 |
| 2.265 | 7.87E-10 | LSM3                                                   | LSM3             | NM_014463 |
| 2.265 | 1.61E-12 | RBM8A                                                  | RBM8A            | BC017770  |
| 2.263 | 1.60E-08 | PIK3R4                                                 | PIK3R4           | NM_014602 |
| 2.263 | 5.68E-13 | CDC26                                                  | CDC26            | NM_139286 |
| 2.263 | 1.63E-10 | SCP2                                                   | SCP2             | NM_002979 |
| 2.262 | 2.29E-05 | RPE                                                    | RPE              | NM_006916 |
| 2.262 | 3.41E-09 |                                                        | MGC19556         | NM_033551 |

**Supplementary Table 3.** Gene expression signature defining prognostic subgroups in AAV. 1228 genes showing differential expression between subgroups 8.1 and 8.2 in a cohort of 59 AAV patients with fold-change greater than 2 and FDR-corrected p-value <0.05. Fold-change (FC) and FDR-corrected p-value (FDR p) are given for each gene along with Gene Symbol and Genbank Accession identifier.

|       |          |               |                 |           |
|-------|----------|---------------|-----------------|-----------|
| 2.26  | 5.07E-06 | DLG3          | DLG3            | NM_021120 |
| 2.26  | 1.47E-10 | FLJ12484      | FLJ12484        | NM_022767 |
| 2.26  | 3.86E-08 | DKFZp547B1713 | DKFZp547B1713   | NM_152379 |
| 2.259 | 2.31E-09 | PS1D          | PS1D            | NM_016505 |
| 2.258 | 3.94E-08 | FLJ21439      | FLJ21439        | NM_025137 |
| 2.256 | 2.92E-07 | SHOC2         | SHOC2           | NM_007373 |
| 2.255 | 7.16E-11 | C14orf130     | C14orf130       | NM_018108 |
| 2.254 | 1.04E-11 | SEC63         | SEC63           | NM_007214 |
| 2.253 | 5.49E-07 |               | SQV7L           | XM_351842 |
| 2.253 | 1.13E-07 | AP2B1         | AP2B1           | NM_001282 |
| 2.253 | 2.49E-11 | NT5E          | NT5E            | NM_002526 |
| 2.25  | 2.64E-07 | ATIC          | ATIC            | NM_004044 |
| 2.249 | 1.86E-07 | CDK3          | CDK3            | NM_001258 |
| 2.248 | 1.09E-08 | C20orf111     | C20orf111       | NM_016470 |
| 2.248 | 2.03E-07 | TTC12         | FLJ20535        | NM_017868 |
| 2.248 | 1.23E-09 | INPP5B        | INPP5B          | M74161    |
| 2.248 | 1.74E-09 | RNF14         | RNF14           | NM_004290 |
| 2.247 | 7.87E-10 | FLJ20534      | FLJ20534        | NM_017867 |
| 2.245 | 1.06E-06 | SLC25A29      | YY1             | BC051735  |
| 2.244 | 4.76E-10 | SH2BP1        | SH2BP1          | NM_014633 |
| 2.244 | 9.65E-10 | FLJ30525      | FLJ30525        | NM_144584 |
| 2.244 | 6.37E-09 | MGC15606      | MGC15606        | NM_145037 |
| 2.242 | 9.70E-05 | CDKN3         | CDKN3           | NM_005192 |
| 2.242 | 5.72E-10 | ARID4B        | RBP1L1          | NM_016374 |
| 2.241 | 1.86E-08 | LCMT1         | LCMT1           | NM_016015 |
| 2.241 | 5.03E-09 | RAP80         | .               | NM_016290 |
| 2.239 | 7.86E-09 | CDKL1         | CDKL1           | NM_004196 |
| 2.238 | 2.92E-08 | ILF2          | ILF2            | NM_004515 |
| 2.238 | 9.74E-09 | MTRR          | MTRR            | NM_002454 |
| 2.237 | 3.93E-07 | MLL3          | MLL3            | NM_021230 |
| 2.236 | 3.23E-10 | PDHA1         | PDHA1           | NM_000284 |
| 2.235 | 1.20E-07 | HMGCL         | HMGCL           | NM_000191 |
| 2.234 | 9.00E-07 | WDR20         | WDR20           | NM_144574 |
| 2.234 | 6.89E-09 | FLJ25692      | .               | NM_173518 |
| 2.233 | 2.34E-06 | KIAA0478      | .               | NM_014870 |
| 2.233 | 1.91E-05 | PSMC4         | PSMC4           | NM_006503 |
| 2.231 | 2.75E-09 | LETMD1        | HCCR1           | NM_015416 |
| 2.23  | 3.98E-09 | C10orf118     | FLJ10188        | NM_018017 |
| 2.229 | 3.28E-07 | SFRS11        | SFRS11          | NM_004768 |
| 2.229 | 7.92E-11 | SDCCAG8       | SDCCAG8         | NM_006642 |
| 2.228 | 1.79E-09 | TARDBP        | AF311304;TARDBP | NM_031214 |
| 2.227 | 7.32E-12 | FNBP4         | FNBP4           | NM_015308 |
| 2.227 | 6.00E-15 | ZNF226        | ZNF226          | NM_016444 |
| 2.226 | 5.68E-08 | CDK5RAP1      | CDK5RAP1        | NM_016082 |
| 2.225 | 4.23E-10 | C6orf70       | FLJ11152        | AK002014  |
| 2.225 | 2.88E-07 | SOS1          | SOS1            | H64325    |
| 2.225 | 2.50E-06 |               | #NA             | HSTCRA031 |
| 2.224 | 9.33E-08 | ARFGAP3       | ARFGAP3         | NM_014570 |
| 2.223 | 1.11E-13 | C9orf78       | LOC51759        | NM_016482 |



**Supplementary Table 3.** Gene expression signature defining prognostic subgroups in AAV. 1228 genes showing differential expression between subgroups 8.1 and 8.2 in a cohort of 59 AAV patients with fold-change greater than 2 and FDR-corrected p-value <0.05. Fold-change (FC) and FDR-corrected p-value (FDR p) are given for each gene along with Gene Symbol and Genbank Accession identifier.

|       |          |             |                   |           |
|-------|----------|-------------|-------------------|-----------|
| 2.223 | 7.78E-07 | LOC144363   | KRAS2             | AK095164  |
| 2.221 | 1.01E-11 | COPB        | COPB              | NM_016451 |
| 2.22  | 3.40E-06 | OK/SW-cl.56 | OK/SW-cl.56       | NM_178014 |
| 2.219 | 1.79E-11 | ATP5J2      | ATP5J2            | NM_004889 |
| 2.219 | 9.24E-13 | WINS1       | WINS1             | NM_018148 |
| 2.217 | 1.33E-10 | C9orf5      | C9orf5            | NM_032012 |
| 2.217 | 2.12E-10 | C10orf125   | LOC282969         | XM_208461 |
| 2.216 | 1.16E-10 | FLJ22490    | FLJ22490          | BC029445  |
| 2.216 | 3.07E-09 | EPS15       | EPS15             | NM_001981 |
| 2.215 | 2.44E-06 | ARIH1       | ARIH1             | NM_005744 |
| 2.215 | 3.69E-10 |             | EIF4B             | NM_018507 |
| 2.214 | 4.79E-07 | CCNG1       | CCNG1             | NM_004060 |
| 2.213 | 4.16E-10 | C20orf43    | C20orf43          | NM_016407 |
| 2.213 | 1.42E-08 | CDC5L       | CDC5L             | NM_001253 |
| 2.212 | 5.39E-09 | USP7        | USP7              | NM_003470 |
| 2.211 | 9.23E-09 | ZNF30       | DKFZp686N19164    | XM_028742 |
| 2.209 | 3.13E-07 | TCEB2       | TCEB2             | NM_007108 |
| 2.209 | 4.25E-06 | USP4        | USP4              | NM_003363 |
| 2.209 | 2.64E-10 | SON         | SON               | NM_003103 |
| 2.208 | 3.76E-08 | CDC16       | CDC16             | NM_003903 |
| 2.208 | 6.74E-09 | IMPA1       | IMPA1             | NM_005536 |
| 2.208 | 2.80E-08 | IQWD1       | PC326             | NM_018442 |
| 2.208 | 5.26E-07 | FLJ12892    | FLJ12892          | NM_022757 |
| 2.207 | 0.00010  | GBP5        | GBP5              | NM_052942 |
|       | 2        |             |                   |           |
| 2.207 | 1.34E-08 | FLJ10980    | FLJ10980          | XM_035527 |
| 2.206 | 3.30E-09 | PRPF4       | PRPF4             | NM_004697 |
| 2.204 | 4.05E-08 | DZIP3       | DZIP3             | NM_014648 |
| 2.203 | 8.11E-07 | AP3S2       | AP3S2             | NM_005829 |
| 2.202 | 2.93E-09 |             | USP24             | XM_038933 |
| 2.201 | 6.78E-09 | SMAD2       | MADH2             | NM_005901 |
| 2.201 | 3.06E-08 | RNF10       | RNF10             | NM_014868 |
| 2.2   | 1.14E-05 | VPS13C      | FLJ10381;KIAA1421 | AB037842  |
| 2.2   | 8.97E-08 | MOCS2       | MOCS2             | NM_004531 |
| 2.2   | 0.00162  |             | #NA               | AF060132  |
| 2.2   | 0.0017   | FLJ31951    | FLJ31951          | NM_144726 |
| 2.2   | 0.00017  | IL2RG       | IL2RG             | NM_000206 |
|       | 9        |             |                   |           |
| 2.199 | 4.64E-13 | SDAD1       | FLJ10498          | NM_018115 |
| 2.198 | 5.70E-11 | MYCBP2      | PAM               | AK000968  |
| 2.198 | 1.13E-10 |             | KIAA0117          | XM_290939 |
| 2.198 | 0.0068   | IGKC        | IGKC              | L40695    |
| 2.197 | 4.37E-07 |             | FLJ14743          | XM_042708 |
| 2.197 | 7.91E-10 | DNMT3A      | DNMT3A            | NM_022552 |
| 2.196 | 3.51E-07 | BAZ1A       | BAZ1A             | NM_013448 |
| 2.195 | 4.86E-09 | PIGC        | PIGC              | NM_002642 |
| 2.193 | 7.96E-11 | FLJ10520    | FLJ10520          | NM_018124 |
| 2.19  | 6.90E-09 |             | PHF14             | NM_014660 |
| 2.189 | 1.57E-07 | ARFGEF2     | ARFGEF2           | NM_006420 |

**Supplementary Table 3.** Gene expression signature defining prognostic subgroups in AAV. 1228 genes showing differential expression between subgroups 8.1 and 8.2 in a cohort of 59 AAV patients with fold-change greater than 2 and FDR-corrected p-value <0.05. Fold-change (FC) and FDR-corrected p-value (FDR p) are given for each gene along with Gene Symbol and Genbank Accession identifier.

|       |          |              |                 |           |
|-------|----------|--------------|-----------------|-----------|
| 2.189 | 1.17E-06 | TSPYL1       | TSPYL           | AL136629  |
| 2.188 | 0.000107 |              | KIAA0114        | XM_353348 |
| 2.187 | 2.45E-09 | CGI-119      | CGI-119         | NM_016056 |
| 2.185 | 1.44E-07 | CENTB2       | CENTB2          | NM_012287 |
| 2.185 | 1.19E-08 | FLJ32440     | FLJ32440        | NM_173685 |
| 2.184 | 2.58E-09 | FXR1         | FXR1            | NM_005087 |
| 2.184 | 6.90E-10 | CDC42        | CDC42           | NM_001791 |
| 2.182 | 4.97E-08 | BCL2         | BCL2            | NM_000633 |
| 2.182 | 7.50E-09 | ELMO1        | ELMO1           | NM_014800 |
| 2.181 | 2.82E-08 | RAB21        | RAB21           | NM_014999 |
| 2.18  | 4.01E-09 | RASA2        | RASA2           | NM_006506 |
| 2.18  | 3.89E-08 | MACF1        | MACF1           | NM_012090 |
| 2.179 | 2.99E-12 | SIN3A        | SIN3A           | NM_015477 |
| 2.178 | 1.92E-11 | CGI-94       | CGI-94          | NM_016037 |
| 2.178 | 6.48E-08 | DER1         | PRO2577;MGC3067 | NM_018630 |
| 2.178 | 7.30E-10 | CGI-30       | CGI-30          | NM_015958 |
| 2.177 | 1.22E-09 | MBIP         | MBIP            | NM_016586 |
| 2.177 | 1.82E-05 | MADP-1       | MADP-1          | NM_033114 |
| 2.176 | 5.02E-11 | LOC440138    | KIAA0266        | NM_021645 |
| 2.176 | 7.25E-08 | ATM          | ATM             | NM_138293 |
| 2.175 | 2.73E-09 | TTF1         | TTF1            | NM_007344 |
| 2.175 | 9.87E-09 | USP18        | USP18           | NM_017414 |
| 2.174 | 4.19E-10 | SCFD1        | SCFD1;C14orf163 | NM_016106 |
| 2.173 | 1.49E-06 | STAT1        | STAT1           | NM_007315 |
| 2.173 | 3.94E-12 | C14orf1      | C14orf1         | NM_007176 |
| 2.172 | 2.44E-09 | NIF3L1       | NIF3L1          | NM_021824 |
| 2.171 | 9.34E-12 | KIAA0372     | KIAA0372        | NM_014639 |
| 2.171 | 6.68E-07 | KLF12        | KLF12           | NM_016285 |
| 2.171 | 0.00594  | IGKC         | IGKC            | AJ388654  |
| 2.17  | 5.32E-07 | NAPG         | NAPG            | NM_003826 |
| 2.168 | 3.34E-07 | NR1D2        | NR1D2           | NM_005126 |
| 2.168 | 1.14E-05 | KIAA1117     | KIAA1117        | NM_015018 |
| 2.167 | 7.62E-10 | RNUT1        | RNUT1           | NM_005701 |
| 2.167 | 4.57E-08 | LOC400986    | KIAA1641        | AL832977  |
| 2.166 | 5.22E-08 | ATF7IP       | ATF7IP          | NM_018179 |
| 2.166 | 6.32E-10 | SORL1        | SORL1           | AA424516  |
| 2.165 | 3.54E-08 | STAT3        | STAT3           | BC029783  |
| 2.165 | 2.51E-08 | SNAPC3       | SNAPC3          | NM_003084 |
| 2.165 | 8.52E-11 | DKFZp761C169 | DKFZp761C169    | NM_022913 |
| 2.163 | 5.24E-06 | HCP5         | HCP5            | NM_006674 |
| 2.163 | 2.75E-07 | FLJ22301     | FLJ22301        | NM_024836 |
| 2.163 | 1.60E-08 | SGPP1        | SGPP1           | NM_030791 |
| 2.163 | 8.70E-08 | MRCL3        | MRCL3           | NM_006471 |
| 2.162 | 4.18E-09 | C13orf22     | D13S106E        | NM_005800 |
| 2.161 | 8.29E-08 | FLJ20696     | FLJ10652        | AB046771  |
| 2.161 | 2.61E-06 | ZNF600       | ZNF28           | U52096    |
| 2.16  | 4.72E-11 | HSPC176      | LOC51693        | NM_016209 |
| 2.16  | 3.24E-10 | FLJ10379     | FLJ10379        | NM_018079 |

**Supplementary Table 3.** Gene expression signature defining prognostic subgroups in AAV. 1228 genes showing differential expression between subgroups 8.1 and 8.2 in a cohort of 59 AAV patients with fold-change greater than 2 and FDR-corrected p-value <0.05. Fold-change (FC) and FDR-corrected p-value (FDR p) are given for each gene along with Gene Symbol and Genbank Accession identifier.

|       |          |                |                   |           |
|-------|----------|----------------|-------------------|-----------|
| 2.16  | 6.83E-07 |                | FLJ10514;C20orf27 | AK022713  |
| 2.16  | 8.68E-07 | DKFZp686L07201 | #NA               | BX537532  |
| 2.16  | 1.82E-08 | YWHAB          | YWHAB;GW128       | NM_003404 |
| 2.159 | 2.69E-08 | EIF3S7         | EIF3S7            | NM_003753 |
| 2.159 | 4.26E-07 | ETEA           | ETEA              | NM_014613 |
| 2.158 | 1.12E-11 | XAB1           | MBDin             | NM_007266 |
| 2.158 | 3.61E-08 | RPF1           | RPF1              | NM_025065 |
| 2.157 | 4.14E-09 | UBE2S          | E2-EPF            | NM_014501 |
| 2.157 | 2.80E-11 | TRNT1          | TRNT1             | NM_016000 |
| 2.157 | 1.85E-08 | C10orf110      | HT009             | NM_018470 |
| 2.156 | 7.46E-09 | VIK            | VIK               | NM_138494 |
| 2.154 | 0.00034  | KIAA0650       | KIAA0650          | BC006008  |
|       | 2        |                |                   |           |
| 2.153 | 7.47E-07 | KLHL5          | CRIP1;ZFP36L1     | AF123320  |
| 2.153 | 2.76E-09 | PPP1R12A       | PPP1R12A          | NM_002480 |
| 2.15  | 0.00011  | SFXN1          | SFXN1             | NM_022754 |
|       | 6        |                |                   |           |
| 2.15  | 1.58E-08 | SDS3           | SDS3              | BC030252  |
| 2.149 | 2.35E-09 | DPP4           | DPP4              | NM_001935 |
| 2.149 | 0.00018  | RDX            | RDX               | NM_002906 |
|       | 7        |                |                   |           |
| 2.148 | 6.52E-08 | RNF137         | RNF137            | NM_018073 |
| 2.148 | 1.88E-06 | C6orf130       | C6orf130          | NM_145063 |
| 2.147 | 5.52E-11 | CIR            | .                 | NM_004882 |
| 2.147 | 1.38E-06 | DDX19          | DDX19             | NM_007242 |
| 2.146 | 9.73E-05 | CD3D           | CD3D              | NM_000732 |
| 2.146 | 8.12E-10 | DEK            | DEK               | NM_003472 |
| 2.145 | 8.97E-08 | NRD1           | NRD1              | NM_002525 |
| 2.144 | 1.28E-09 | DGUOK          | DGUOK             | NM_001929 |
| 2.143 | 1.32E-08 | DCLRE1C        | DCLRE1C           | NM_022487 |
| 2.141 | 5.18E-12 | XPO1           | XPO1              | NM_003400 |
| 2.14  | 9.16E-06 | MPI            | MPI               | NM_002435 |
| 2.14  | 1.07E-07 | DNAJC7         | DNAJC7            | NM_003315 |
| 2.138 | 8.04E-08 | TYMS           | TYMS              | N66132    |
| 2.138 | 5.51E-10 | JIK            | JIK               | NM_016281 |
| 2.138 | 7.48E-09 | LOC339316      | LOC339316         | BC043286  |
| 2.137 | 8.40E-09 | HMGB2          | HMGB2             | NM_002129 |
| 2.135 | 7.96E-10 | LGALS8         | LGALS8            | NM_006499 |
| 2.135 | 2.43E-08 | UGP2           | UGP2              | NM_006759 |
| 2.135 | 1.03E-09 | MGC61716       | MGC61716          | NM_182501 |
| 2.134 | 3.26E-09 | dJ383J4.3      | dJ383J4.3         | BC033154  |
| 2.134 | 8.77E-07 | EIF4A2         | EIF4A2            | NM_001967 |
| 2.133 | 6.70E-10 | HSPC023        | HSPC023           | NM_014047 |
| 2.133 | 2.12E-10 | KLEIP          | AB026190          | NM_014458 |
| 2.132 | 4.96E-07 | CREBBP         | CREBBP            | NM_004380 |
| 2.132 | 1.14E-10 | CGI-07         | CGI-07            | NM_015938 |
| 2.132 | 6.42E-08 | SSB            | SSB               | NM_003142 |
| 2.131 | 3.83E-06 | EIF3S2         | EIF3S2            | NM_003757 |
| 2.131 | 2.60E-09 | QP-C           | QP-C              | NM_014402 |

**Supplementary Table 3.** Gene expression signature defining prognostic subgroups in AAV. 1228 genes showing differential expression between subgroups 8.1 and 8.2 in a cohort of 59 AAV patients with fold-change greater than 2 and FDR-corrected p-value <0.05. Fold-change (FC) and FDR-corrected p-value (FDR p) are given for each gene along with Gene Symbol and Genbank Accession identifier.

|       |          |               |               |           |
|-------|----------|---------------|---------------|-----------|
| 2.131 | 4.14E-09 | AP1GBP1       | AP1GBP1       | NM_080551 |
| 2.13  | 1.59E-11 | LNPEP         | LNPEP         | NM_005575 |
| 2.13  | 1.84E-11 | DKFZP564G2022 | DKFZP564G2022 | NM_015497 |
| 2.13  | 5.14E-08 | ADHFE1        | ADHFE1        | NM_144650 |
| 2.129 | 1.25E-09 | SEDL          | SEDL          | NM_014563 |
| 2.128 | 4.22E-10 | MORF4L2       | MORF4L2       | NM_012286 |
| 2.128 | 3.61E-08 | TERF2IP       | TERF2IP       | NM_018975 |
| 2.128 | 6.05E-09 | ATP1A1        | ATP1A1        | NM_000701 |
| 2.127 | 6.89E-08 | TNFAIP8       | GG2-1         | NM_014350 |
| 2.126 | 3.05E-06 | CGI-37        | CGI-37        | NM_016101 |
| 2.126 | 2.00E-09 | FBXO34        | FBXO34        | NM_017943 |
| 2.126 | 8.79E-07 | ZNF294        | ZNF294        | AK001915  |
| 2.126 | 8.04E-11 | FLJ21657      | FLJ21657      | NM_022483 |
| 2.126 | 2.64E-09 | HNRPUL1       | E1B-AP5       | NM_007040 |
| 2.125 | 6.16E-08 | HSPD1         | HSPD1         | NM_002156 |
| 2.125 | 1.63E-09 |               | #NA           | BC037888  |
| 2.124 | 1.22E-10 | CSPG6         | CSPG6         | NM_005445 |
| 2.124 | 1.83E-08 | FYB           | FYB           | NM_001465 |
| 2.123 | 3.41E-09 | USP52         | USP52         | NM_014871 |
| 2.123 | 3.34E-13 | CYP20A1       | CYP20A1       | NM_020674 |
| 2.123 | 5.84E-14 | SF3B5         | SF3B5         | NM_031287 |
| 2.123 | 5.70E-10 | RPA1          | RPA1          | NM_002945 |
| 2.121 | 3.93E-07 | NGLY1         | NGLY1         | NM_018297 |
| 2.121 | 8.99E-11 | FLJ21919      | FLJ21919      | NM_023015 |
| 2.121 | 1.97E-11 |               | CGI-30        | NM_017685 |
| 2.121 | 1.61E-12 | PFAAP5        | CG012         | AA699390  |
| 2.121 | 9.62E-14 | NFATC3        | NFATC3        | NM_173163 |
| 2.12  | 3.77E-05 | TP53TG3       | TP53TG3       | NM_015369 |
| 2.12  | 1.37E-06 | RPS18         | RPS18         | NM_022551 |
| 2.118 | 2.67E-07 | KIS           | KIS           | AL137257  |
| 2.115 | 2.12E-05 | HERC5         | CEB1          | NM_016323 |
| 2.113 | 4.92E-12 | C19orf13      | DKFZP434D1335 | NM_015578 |
| 2.113 | 4.00E-11 | SELT          | SELT          | NM_016275 |
| 2.113 | 4.18E-09 | FLJ20272      | FLJ20272      | NM_017735 |
| 2.113 | 1.11E-07 | VPS41         | VPS41         | NM_080631 |
| 2.112 | 4.15E-12 | NHP2L1        | NHP2L1        | NM_005008 |
| 2.112 | 6.40E-11 | AP1GBP1       | AP1GBP1       | NM_007247 |
| 2.112 | 3.07E-06 | HNRPR         | HNRPR         | NM_005826 |
| 2.112 | 3.07E-12 | PPIG          | PPIG          | NM_004792 |
| 2.111 | 3.95E-09 | ABCF2         | ABCF2         | NM_005692 |
| 2.111 | 9.79E-07 | SDBCAG84      | SDBCAG84      | NM_015966 |
| 2.111 | 1.62E-11 | EZH1          | EZH1          | NM_001991 |
| 2.111 | 9.48E-06 | IL10RA        | IL10RA        | NM_001558 |
| 2.111 | 4.71E-08 | LOC127253     | LOC127253     | XM_059122 |
| 2.11  | 2.09E-09 | C10orf78      | LOC119392     | NM_145247 |
| 2.11  | 1.70E-11 | WAC           | WAC           | NM_016628 |
| 2.11  | 8.32E-09 | DDX39         | DDX39         | NM_005804 |
| 2.108 | 9.65E-15 | EIF4G2        | EIF4G2        | NM_001418 |
| 2.107 | 2.33E-08 | TAP1          | TAP1          | NM_000593 |

**Supplementary Table 3.** Gene expression signature defining prognostic subgroups in AAV. 1228 genes showing differential expression between subgroups 8.1 and 8.2 in a cohort of 59 AAV patients with fold-change greater than 2 and FDR-corrected p-value <0.05. Fold-change (FC) and FDR-corrected p-value (FDR p) are given for each gene along with Gene Symbol and Genbank Accession identifier.

|       |          |          |                 |             |
|-------|----------|----------|-----------------|-------------|
| 2.106 | 2.41E-08 | ING3     | ING3            | NM_019071   |
| 2.105 | 3.52E-09 | CHD7     | KIAA1416        | AK000364    |
| 2.105 | 7.70E-06 | CCR5     | CCR5            | NM_000579   |
| 2.105 | 2.63E-08 | SSBP1    | SSBP1           | NM_003143   |
| 2.105 | 2.11E-08 | HSHIN1   | HSHIN1;KIAA1046 | NM_014928   |
| 2.104 | 4.29E-11 | THOC2    | THOC2           | XM_047325   |
| 2.104 | 1.98E-07 | C21orf66 | C21orf66        | NM_013329   |
| 2.103 | 2.76E-09 | RPS6KB1  | RPS6KB1         | NM_003161   |
| 2.102 | 9.13E-09 | MRPL13   | MRPL13          | NM_014078   |
| 2.102 | 7.30E-10 | USP34    | USP34           | BC022783    |
| 2.102 | 6.56E-12 | USP9X    | USP9X           | NM_004652   |
| 2.102 | 1.22E-07 | SARA1    | SARA1           | NM_020150   |
| 2.101 | 2.11E-08 | HARSL    | HARSL           | NM_012208   |
| 2.1   | 4.56E-06 | MYO9A    | #NA             | BC039397    |
| 2.099 | 5.73E-06 | MGC3248  | MGC3248         | NM_032486   |
| 2.099 | 0.00050  | RPS21    | RPS21           | NM_001024   |
| 2.098 | 2.24E-10 | ZNF258   | ZNF258          | NM_007167   |
| 2.097 | 8.35E-11 | CSTL1    | CSTL1           | NM_138283   |
| 2.096 | 5.00E-05 |          | #NA             | CD522594    |
| 2.095 | 2.60E-09 |          | LOC375797       | XM_353502   |
| 2.092 | 4.47E-10 | UBE4A    | UBE4A           | NM_004788   |
| 2.092 | 2.91E-06 | P29      | P29             | BC015824    |
| 2.091 | 7.56E-09 | CSNK2A2  | CSNK2A2         | AK090752    |
| 2.09  | 2.70E-10 | NEDD5    | NEDD5           | NM_004404   |
| 2.09  | 9.48E-10 | LKAP     | LKAP            | NM_019081   |
| 2.09  | 4.10E-05 | MT1F     | MT1F            | NM_005949   |
| 2.089 | 5.35E-07 | PCAF     | PCAF            | NM_003884   |
| 2.089 | 7.57E-06 | C21orf66 | C21orf66        | NM_058191   |
| 2.089 | 3.41E-09 | SR140    | SR140           | XM_031553   |
| 2.088 | 3.50E-05 | TIMM10   | TIMM10          | NM_012456   |
| 2.088 | 2.25E-06 | HSPC150  | HSPC150         | NM_014176   |
| 2.088 | 7.30E-10 | MTM1     | MTM1            | NM_000252   |
| 2.087 | 1.67E-10 | ZNF277   | ZNF277          | NM_021994   |
| 2.087 | 3.82E-08 | TMEM32   | LOC93380        | NM_173470   |
| 2.086 | 4.10E-05 | HTLF     | HTLF            | NM_002158   |
| 2.085 | 1.39E-16 | MTO1     | MTO1            | NM_012123   |
| 2.084 | 4.11E-07 | USP34    | USP34           | XM_291018   |
| 2.084 | 3.62E-07 | FLJ11088 | FLJ11088        | NM_018318   |
| 2.084 | 6.97E-09 | ZCCHC7   | FLJ22611        | NM_032226   |
| 2.084 | 6.53E-05 |          | #NA             | HSVA51A_140 |
| 2.082 | 1.04E-09 | XPO4     | XPO4            | NM_022459   |
| 2.082 | 4.73E-09 | SYNE1    | SYNE1           | NM_015293   |
| 2.081 | 1.56E-09 | TIAL1    | TIAL1           | NM_003252   |
| 2.08  | 4.90E-09 | ZMYM1    | FLJ23151        | NM_024772   |
| 2.08  | 4.11E-07 | SPTLC1   | SPTLC1          | NM_178324   |
| 2.079 | 2.54E-05 | CD226    | CD226           | NM_006566   |
| 2.079 | 4.81E-09 | VAMP8    | VAMP8           | NM_003761   |
| 2.079 | 3.41E-09 | TWISTNB  | TWISTNB         | AK090846    |

**Supplementary Table 3.** Gene expression signature defining prognostic subgroups in AAV. 1228 genes showing differential expression between subgroups 8.1 and 8.2 in a cohort of 59 AAV patients with fold-change greater than 2 and FDR-corrected p-value <0.05. Fold-change (FC) and FDR-corrected p-value (FDR p) are given for each gene along with Gene Symbol and Genbank Accession identifier.

|       |          |           |              |           |
|-------|----------|-----------|--------------|-----------|
| 2.078 | 7.66E-11 | CGI-116   | CGI-116      | NM_016053 |
| 2.078 | 1.78E-08 | MAK3      | MAK3P        | NM_025146 |
| 2.078 | 3.04E-06 | C20orf71  | C20orf71     | NM_178466 |
| 2.078 | 2.92E-09 | MGC20806  | MGC20806     | NM_144999 |
| 2.077 | 6.67E-13 | GTF2H3    | GTF2H3       | NM_001516 |
| 2.077 | 3.58E-06 | USP14     | USP14        | NM_005151 |
| 2.076 | 8.54E-11 | PCM1      | PCM1         | NM_006197 |
| 2.076 | 4.11E-07 | WDR35     | KIAA1336     | NM_020779 |
| 2.075 | 1.67E-12 | LOC284591 | LOC284591    | BC015393  |
| 2.073 | 2.17E-06 | FLJ12270  | FLJ12270     | XM_290704 |
| 2.073 | 3.67E-07 | INPP4A    | INPP4A       | NM_001566 |
| 2.072 | 1.72E-10 | DNAJA2    | DNAJA2       | NM_005880 |
| 2.072 | 6.78E-08 | NYD-SP28  | NYD-SP28     | NM_033124 |
| 2.071 | 6.54E-10 | HSA9761   | HSA9761      | NM_014473 |
| 2.07  | 0.00039  | PSMD5     | LOC253039    | AK096706  |
| 2.07  | 2.25E-08 | ARID1A    | SMARCF1      | NM_006015 |
| 2.069 | 1.17E-06 | HMGN4     | HMGN4        | NM_006353 |
| 2.069 | 1.33E-06 |           | #NA          | HSM801128 |
| 2.068 | 1.11E-08 | ABCE1     | ABCE1        | AB062293  |
| 2.067 | 1.24E-07 | PCAF      | PCAF         | N74637    |
| 2.065 | 3.78E-05 | RPL10A    | RPL10A       | NM_007104 |
| 2.065 | 8.14E-09 | NS3TP1    | NS3TP1       | NM_019048 |
| 2.064 | 4.14E-07 | MYL6      | MYL6         | NM_021019 |
| 2.064 | 1.28E-07 | CYCS      | CYCS         | NM_018947 |
| 2.062 | 3.13E-08 | HSPC163   | HSPC163      | NM_014184 |
| 2.062 | 9.39E-11 | SRP9      | SRP9         | NM_003133 |
| 2.061 | 2.58E-09 | SFRS2IP   | SFRS2IP      | NM_004719 |
| 2.061 | 6.92E-07 | RAB5B     | RAB5B        | NM_002868 |
| 2.06  | 2.97E-11 | KPNA5     | KPNA5        | NM_002269 |
| 2.06  | 0.00144  | BTG1      | BTG1         | NM_001731 |
| 2.059 | 3.17E-11 | AKAP8     | AKAP8        | NM_005858 |
| 2.059 | 2.31E-09 | C10orf117 | AD24         | NM_022451 |
| 2.058 | 3.70E-09 | DDHD2     | KIAA0725     | AB018268  |
| 2.058 | 1.30E-09 | MGC40499  | MGC40499     | NM_152755 |
| 2.055 | 4.20E-07 | SERPINI1  | SERPINI1     | NM_005025 |
| 2.055 | 8.87E-09 | THUMPD3   | DKFZP434F091 | NM_015453 |
| 2.055 | 1.33E-09 | CIRH1A    | CIRH1A       | NM_032830 |
| 2.055 | 6.32E-09 | PHAX      | PHAX         | NM_032177 |
| 2.054 | 1.44E-08 | TRERF1    | TReP-132     | AF111801  |
| 2.054 | 3.32E-11 | LOC317671 | LOC317671    | NM_173362 |
| 2.053 | 4.90E-06 | L3MBTL2   | L3MBTL2      | NM_031488 |
| 2.053 | 1.25E-09 | PFDN1     | PFDN1        | NM_002622 |
| 2.052 | 9.96E-09 | PPP2R5A   | PPP2R5A      | NM_006243 |
| 2.052 | 0.00165  | PTGER2    | PTGER2       | NM_000956 |
| 2.052 | 9.60E-05 | HADHB     | HADHB        | NM_000183 |
| 2.051 | 8.01E-10 | ZMPSTE24  | ZMPSTE24     | NM_005857 |
| 2.051 | 1.32E-10 | PACE-1    | PACE-1       | NM_020423 |
| 2.05  | 3.01E-05 | LOC51326  | LOC51326     | NM_016632 |

**Supplementary Table 3.** Gene expression signature defining prognostic subgroups in AAV. 1228 genes showing differential expression between subgroups 8.1 and 8.2 in a cohort of 59 AAV patients with fold-change greater than 2 and FDR-corrected p-value <0.05. Fold-change (FC) and FDR-corrected p-value (FDR p) are given for each gene along with Gene Symbol and Genbank Accession identifier.

|       |          |           |                    |           |
|-------|----------|-----------|--------------------|-----------|
| 2.05  | 5.52E-08 | C22orf19  | C22orf19           | NM_003678 |
| 2.049 | 1.06E-09 | ARCNI     | ARCNI              | NM_001655 |
| 2.048 | 1.97E-07 | CSNK1G3   | CSNK1G3            | NM_004384 |
| 2.048 | 4.61E-08 | FLJ25059  | FLJ25059           | NM_144981 |
| 2.047 | 6.11E-09 | DLG1      | DLG1               | NM_004087 |
| 2.047 | 1.49E-07 | ITM2C     | ITM2C              | NM_030926 |
| 2.047 | 1.30E-10 | MGC17337  | MGC17337           | NM_080655 |
| 2.047 | 3.50E-05 | MGC15763  | MGC15763           | NM_138381 |
| 2.047 | 7.67E-06 | ADCY7     | ADCY7              | NM_001114 |
| 2.046 | 4.45E-08 | P66beta   | P66beta            | NM_020699 |
| 2.046 | 1.82E-08 | FLJ36674  | FLJ36674           | NM_173622 |
| 2.046 | 2.23E-07 | LOC255743 | LOC255743          | XM_171089 |
| 2.043 | 1.17E-10 | C14orf92  | C14orf92           | NM_014828 |
| 2.043 | 4.81E-10 | AIM1      | AIM1               | XM_166300 |
| 2.042 | 5.69E-10 | ORC3L     | ORC3L              | NM_012381 |
| 2.042 | 1.62E-09 | DDX26     | DDX26              | NM_012141 |
| 2.041 | 2.76E-06 | TTC10     | TG737              | NM_006531 |
| 2.041 | 6.36E-09 | PJA2      | PJA2               | NM_014819 |
| 2.041 | 1.71E-08 |           | PEN2;PEN-2         | NM_018468 |
| 2.041 | 3.86E-08 | SMARCE1   | SMARCE1            | NM_003079 |
| 2.041 | 2.62E-05 |           | #NA                | HSTCRGAAQ |
| 2.04  | 3.52E-09 | FLJ21616  | FLJ21616           | NM_024567 |
| 2.04  | 2.86E-08 | ZNF571    | HSPC059            | NM_016536 |
| 2.04  | 2.48E-07 | AAK1      | AAK1               | NM_014911 |
| 2.039 | 2.28E-09 | C1QDC1    | EEG1;C1QDC1        | NM_023925 |
| 2.039 | 2.94E-08 | MVK       | MVK                | NM_000431 |
| 2.038 | 1.34E-10 | CD28      | CD28               | NM_006139 |
| 2.038 | 7.66E-10 | ZNF317    | ZNF317             | NM_020933 |
| 2.038 | 3.17E-11 | MRPS21    | MRPS21             | NM_018997 |
| 2.037 | 6.62E-07 | KIAA0020  | XTP5               | NM_014878 |
| 2.037 | 2.57E-11 | PAG       | PAG                | NM_018440 |
| 2.037 | 6.23E-06 | KIAA0555  | KIAA0555           | NM_014790 |
| 2.034 | 1.91E-09 | EIF2S1    | EIF2S1             | NM_004094 |
| 2.034 | 6.09E-10 | MDS025    | MDS025             | NM_021825 |
| 2.033 | 1.91E-09 | METAP1    | METAP1             | NM_015143 |
| 2.033 | 4.69E-07 | CD48      | CD48               | BC030224  |
| 2.032 | 6.51E-06 | HNRPK     | HNRPK              | NM_002140 |
| 2.031 | 3.07E-10 | UBCE7IP5  | FLJ13149           | NM_021826 |
| 2.031 | 3.96E-08 | C14orf139 | C14orf139          | NM_024633 |
| 2.031 | 7.67E-06 | TMEM14B   | TMEM14B            | NM_030969 |
| 2.031 | 2.87E-10 | ZNF207    | ZNF207             | NM_003457 |
| 2.03  | 1.01E-09 | CGRRF1    | CGRRF1             | NM_006568 |
| 2.03  | 1.22E-06 | CYLC1     | CYLC1              | XM_088636 |
| 2.03  | 4.24E-06 | DOCK2     | DOCK2              | NM_004946 |
| 2.029 | 4.27E-08 | USP8      | .                  | NM_005154 |
| 2.029 | 4.34E-10 | PARP6     | LOC56965           | NM_020213 |
| 2.029 | 6.61E-08 | THADA     | FLJ21877;LOC375199 | XM_351433 |
| 2.028 | 1.74E-09 | LCHN      | LCHN               | AB032973  |
| 2.028 | 0.0074   | MSC       | MSC                | NM_005098 |

**Supplementary Table 3.** Gene expression signature defining prognostic subgroups in AAV. 1228 genes showing differential expression between subgroups 8.1 and 8.2 in a cohort of 59 AAV patients with fold-change greater than 2 and FDR-corrected p-value <0.05. Fold-change (FC) and FDR-corrected p-value (FDR p) are given for each gene along with Gene Symbol and Genbank Accession identifier.

|       |          |                 |                   |           |
|-------|----------|-----------------|-------------------|-----------|
| 2.028 | 9.41E-09 | PTPN1           | PTPN1             | NM_002827 |
| 2.028 | 4.90E-05 | PAM             | PAM               | NM_000919 |
| 2.027 | 3.50E-10 | VDP             | VDP               | NM_003715 |
| 2.026 | 5.72E-07 | CLGN            | CLGN              | NM_004362 |
| 2.025 | 1.72E-07 | HERC1           | HERC1             | NM_003922 |
| 2.025 | 3.24E-10 |                 | LQFBS-1           | XM_352971 |
| 2.025 | 1.70E-08 |                 | #NA               | AL080216  |
| 2.025 | 1.23E-07 | HSPDP3; HSP60P3 | HSPDP1;HSPDP3     | M34661    |
| 2.024 | 3.35E-08 | NDUFB4          | NDUFB4            | NM_004547 |
| 2.024 | 1.33E-10 | HECA            | HECA              | NM_016217 |
| 2.024 | 0.00017  | RBM20           | LOC282996         | AL832084  |
| 2.023 | 5.85E-05 | NFKB1           | NFKB1             | NM_003998 |
| 2.023 | 4.47E-10 | SKIIP           | SNW1              | NM_012245 |
| 2.021 | 3.01E-10 | HECTD1          | HECTD1            | NM_015382 |
| 2.021 | 1.94E-06 | KIAA1712        | KIAA1712          | NM_030633 |
| 2.02  | 9.51E-09 | PIM2            | .                 | NM_006875 |
| 2.02  | 0.00013  | LSM5            | LSM5              | NM_012322 |
|       | 4        |                 |                   |           |
| 2.018 | 3.49E-08 | RANBP9          | RANBP9            | NM_005493 |
| 2.018 | 2.30E-09 | BRIX            | BRIX              | NM_018321 |
| 2.018 | 1.04E-11 | C14orf11        | C14orf11          | NM_018453 |
| 2.017 | 3.52E-07 | C6orf51         | C6orf51           | NM_138408 |
| 2.017 | 1.57E-07 | KIAA1971        | KIAA1971          | XM_058720 |
| 2.017 | 2.36E-07 | JMJD2C          | GASC1             | NM_015061 |
| 2.016 | 3.34E-05 | FLJ14639        | FLJ14639          | NM_032815 |
| 2.016 | 2.76E-10 | C14orf150       | LOC112840         | NM_080666 |
| 2.016 | 6.41E-08 | FAM33A          | LOC348235         | NM_182620 |
| 2.016 | 9.39E-11 | NUP160          | NUP160            | XM_113678 |
| 2.016 | 2.57E-10 | WHSC1L1         | WHSC1L1           | NM_017778 |
| 2.015 | 2.76E-06 | DJ971N18.2      | DJ971N18.2        | NM_021156 |
| 2.015 | 1.82E-07 | CCRN4L          | CCRN4L            | BC021963  |
| 2.015 | 2.14E-06 | PSME4           | PSME4             | D38521    |
| 2.013 | 6.32E-09 | PAK1IP1         | PAK1IP1           | NM_017906 |
| 2.013 | 1.43E-11 | FLJ14007        | FLJ14007          | NM_024699 |
| 2.012 | 6.92E-08 | MTHFD1          | MTHFD1            | NM_005956 |
| 2.011 | 3.02E-06 | LCK             | LCK               | NM_005356 |
| 2.011 | 4.77E-07 | HSPC047         | POLR2J2;HSPC047   | NM_014147 |
| 2.011 | 6.19E-07 | OAS2            | OAS2              | NM_002535 |
| 2.01  | 1.11E-06 | NDUFB8          | NDUFB8            | NM_005004 |
| 2.009 | 1.61E-10 | PCBP2           | DKFZP564J157      | NM_005016 |
| 2.009 | 4.45E-06 | LUC7L           | LUC7L             | NM_018032 |
| 2.009 | 4.80E-07 | ZNF567          | MGC45586          | NM_152603 |
| 2.008 | 1.98E-09 | PARP4           | ADPRTL1           | NM_006437 |
| 2.007 | 7.32E-07 | LOC96610        | LOC96610;KIAA0187 | NM_080926 |
| 2.007 | 1.68E-05 | NRBF2           | NRBF-2            | NM_030759 |
| 2.006 | 3.05E-08 | NDRG3           | NDRG3             | NM_022477 |
| 2.006 | 3.51E-06 | HSPA8           | HSPA8             | NM_006597 |
| 2.005 | 8.04E-11 | PSMB3           | PSMB3             | NM_002795 |
| 2.003 | 0.00047  | KLRD1           | KLRD1             | NM_007334 |



**Supplementary Table 3.** Gene expression signature defining prognostic subgroups in AAV. 1228 genes showing differential expression between subgroups 8.1 and 8.2 in a cohort of 59 AAV patients with fold-change greater than 2 and FDR-corrected p-value <0.05. Fold-change (FC) and FDR-corrected p-value (FDR p) are given for each gene along with Gene Symbol and Genbank Accession identifier.

|       |          |               |                         |           |
|-------|----------|---------------|-------------------------|-----------|
|       | 3        |               |                         |           |
| 2.002 | 5.20E-08 | LRRFIP1       | LRRFIP1                 | NM_004735 |
| 2.002 | 1.33E-08 | CGI-72        | CGI-72                  | NM_016018 |
| 2.001 | 6.15E-07 | NT5C2         | NT5C2                   | NM_012229 |
| 2.001 | 0.00013  |               | FLJ13409                | XM_351837 |
|       | 9        |               |                         |           |
| 2.001 | 0.00044  | RPS15A        | RPS15A                  | NM_001019 |
|       | 4        |               |                         |           |
| 2.001 | 1.11E-07 | XPOT          | XPOT                    | NM_007235 |
| 2     | 8.00E-10 | MCM3          | MCM3                    | NM_002388 |
| 2     | 5.24E-06 | SRPK2         | SRPK2                   | XM_353827 |
| 2     | 0.0039   | FLJ35036      | FLJ35036;FLJ22332       | AK092355  |
| 0.5   | 9.46E-10 |               | #NA                     | AY032661  |
| 0.5   | 2.66E-12 | na            | LOC340549               | XM_293332 |
| 0.499 | 6.02E-09 | LOC340109     | LOC340109               | BC039509  |
| 0.498 | 2.97E-11 | KIAA0922      | KIAA0922                | NM_015196 |
| 0.498 | 4.37E-07 |               | MGC10646                | XM_352953 |
| 0.498 | 6.25E-10 | TCEAL3        | MGC15737                | NM_032926 |
| 0.498 | 8.72E-10 | POU2F2        | POU2F2                  | NM_002698 |
| 0.496 | 1.31E-07 | KIAA1881      | KIAA1881                | AB067468  |
| 0.496 | 1.74E-08 | CSAG2         | TRAG3                   | NM_004909 |
| 0.496 | 6.29E-08 | DKFZp434H0512 | LOC347256               | AL137620  |
| 0.496 | 2.27E-07 | IL11          | IL11                    | NM_000641 |
| 0.495 | 1.01E-06 | CALM3         | CALM3                   | NM_005184 |
| 0.495 | 1.06E-12 | ZYX           | ZYX                     | NM_003461 |
| 0.494 | 2.06E-05 | NAB2          | NAB2                    | NM_005967 |
| 0.494 | 2.01E-09 | RRAS          | RRAS                    | NM_006270 |
| 0.494 | 3.63E-07 | FLJ37078      | FLJ37078                | NM_153043 |
| 0.494 | 8.12E-10 |               | #NA                     | HSM802661 |
| 0.493 | 3.22E-07 | ZNF578        | FLJ31384                | NM_152472 |
| 0.493 | 3.89E-08 |               | LOC339546               | AK093202  |
| 0.492 | 1.33E-09 | PNPLA5        | LOC150379               | NM_138814 |
| 0.492 | 1.88E-08 | CMKOR1        | #NA                     | AF086410  |
| 0.492 | 6.38E-12 |               | LOC374623               | XM_350987 |
| 0.491 | 1.14E-14 | UNQ5783       | UNQ5783                 | AK057142  |
| 0.491 | 2.13E-09 | ALDH3B1       | ALDH3B1                 | NM_000694 |
| 0.49  | 1.45E-07 | SLA/LP        | SLA/LP                  | NM_016955 |
| 0.489 | 5.75E-07 | MGC33584      | REPIN1                  | NM_173680 |
| 0.488 | 2.02E-08 | IFNA13        | IFNA13                  | NM_006900 |
| 0.486 | 1.98E-06 |               | #NA                     | AK092192  |
| 0.486 | 3.17E-11 |               | #NA                     | BC037858  |
| 0.486 | 3.17E-11 |               | #NA                     | BC041856  |
| 0.485 | 2.00E-09 | FIBCD1        | FLJ14810                | NM_032843 |
| 0.482 | 2.24E-06 | VIAAT         | VIAAT                   | NM_080552 |
| 0.482 | 3.22E-07 | FLJ16124      | #NA                     | BC038723  |
| 0.482 | 2.60E-09 |               | #NA                     | AK054990  |
| 0.482 | 2.02E-07 | UGT2B10       | UGT2B10;UGT2B28;UGT2B11 | NM_001075 |
| 0.481 | 1.83E-07 | pp14356       | pp14356                 | AF318340  |

**Supplementary Table 3.** Gene expression signature defining prognostic subgroups in AAV. 1228 genes showing differential expression between subgroups 8.1 and 8.2 in a cohort of 59 AAV patients with fold-change greater than 2 and FDR-corrected p-value <0.05. Fold-change (FC) and FDR-corrected p-value (FDR p) are given for each gene along with Gene Symbol and Genbank Accession identifier.

|       |          |               |               |                |
|-------|----------|---------------|---------------|----------------|
| 0.481 | 1.41E-09 | F12           | F12           | NM_000505      |
| 0.481 | 2.44E-06 |               | #NA           | HSPSG12UT_3586 |
| 0.478 | 8.55E-08 | C14orf166B    | LOC145497     | AK058106       |
| 0.477 | 6.95E-08 | NFKBIL2       | NFKBIL2       | NM_013432      |
| 0.477 | 3.27E-08 | DKFZp761A052  | DKFZp761A052  | NM_017602      |
| 0.477 | 4.63E-10 | KRT14         | KRT14         | NM_000526      |
| 0.477 | 2.02E-11 | PRDM11        | PRDM11        | NM_020229      |
| 0.475 | 8.86E-09 | TIGD1         | EIF4EL3       | NM_145702      |
| 0.475 | 2.69E-08 | PYGL          | PYGL          | NM_002863      |
| 0.474 | 2.53E-07 | FTHFD         | FTHFD         | NM_012190      |
| 0.474 | 8.76E-08 | GPBAR1        | GPBAR1        | NM_170699      |
| 0.474 | 8.26E-06 |               | #NA           | BC038546       |
| 0.471 | 4.67E-06 |               | #NA           | AK057798       |
| 0.471 | 4.69E-07 | FLJ34658      | FLJ34658      | BC035012       |
| 0.471 | 1.56E-13 | DF            | DF            | NM_001928      |
| 0.47  | 2.00E-09 | GABRA3        | GABRA3        | NM_000808      |
| 0.47  | 4.79E-07 | URP           | URP           | AK090630       |
| 0.469 | 3.96E-09 |               | #NA           | AK094154       |
| 0.468 | 2.98E-10 | MMP25         | MMP25         | NM_022718      |
| 0.468 | 3.66E-07 |               | #NA           | AK021981       |
| 0.465 | 0.00028  | ROPN1         | ROPN1         | NM_017578      |
| 0.465 | 8.41E-08 | LOC400752     | #NA           | BC006119       |
| 0.464 | 1.60E-06 | MUC5AC        | MUC5AC        | AJ292079       |
| 0.464 | 9.11E-12 |               | #NA           | BC017939       |
| 0.463 | 2.57E-06 | MGC15613      | MGC15613      | BC007589       |
| 0.462 | 1.39E-08 | FLJ20701      | FLJ20701      | NM_017933      |
| 0.46  | 1.92E-09 |               | LOC376528     | XM_352268      |
| 0.459 | 2.33E-10 | LOC63928      | LOC63928      | NM_022097      |
| 0.459 | 4.91E-07 | LOC114977     | LOC114977     | BC014148       |
| 0.459 | 1.01E-09 | LOC285758     | LOC285758     | BC037331       |
| 0.458 | 8.52E-11 | HSPC142       | HSPC142       | NM_014173      |
| 0.458 | 5.00E-08 | LOC387601     | LOC387601     | AK091990       |
| 0.458 | 1.38E-09 | CACNB3        | .             | NM_000725      |
| 0.457 | 2.25E-07 | CD164L1       | CD164L1       | NM_020404      |
| 0.456 | 2.29E-09 | DKFZP434I2117 | DKFZP434I2117 | NM_031478      |
| 0.455 | 6.86E-08 | ERAF          | ERAF          | NM_016633      |
| 0.453 | 6.80E-08 | MAWBP         | MAWBP         | NM_022129      |
| 0.453 | 3.22E-13 | COMMD4        | FLJ20452      | NM_017828      |
| 0.451 | 6.23E-12 |               | LOC342885     | XM_292775      |
| 0.45  | 1.10E-05 | VIT           | VIT           | NM_053276      |
| 0.45  | 1.35E-05 | CTF1          | CTF1          | NM_001330      |
| 0.449 | 2.93E-11 | C11orf11      | C11orf11      | NM_006133      |
| 0.449 | 2.90E-09 | APRG1         | APRG1         | NM_178343      |
| 0.448 | 6.60E-07 | RAB13         | RAB13         | NM_002870      |
| 0.447 | 2.73E-08 | MGC13102      | MGC13102      | NM_032323      |
| 0.446 | 8.69E-08 | CLDN4         | CLDN4         | NM_001305      |
| 0.445 | 2.03E-08 | LOC90522      | LOC90522      | NM_033557      |
| 0.444 | 2.88E-09 | ERBB4         | #NA           | AK024204       |

**Supplementary Table 3.** Gene expression signature defining prognostic subgroups in AAV. 1228 genes showing differential expression between subgroups 8.1 and 8.2 in a cohort of 59 AAV patients with fold-change greater than 2 and FDR-corrected p-value <0.05. Fold-change (FC) and FDR-corrected p-value (FDR p) are given for each gene along with Gene Symbol and Genbank Accession identifier.

|       |          |                                                |               |           |
|-------|----------|------------------------------------------------|---------------|-----------|
| 0.443 | 2.72E-08 | DNAJC4                                         | DNAJC4        | NM_005528 |
| 0.442 | 4.09E-06 | ACSL3                                          | .             | NM_004457 |
| 0.442 | 1.59E-06 |                                                | LOC376003     | XM_352027 |
| 0.441 | 2.57E-08 |                                                | #NA           | BC006216  |
| 0.44  | 4.75E-08 | PRX                                            | PRX           | NM_020956 |
| 0.44  | 1.23E-09 | LPPR2                                          | LPPR2         | NM_022737 |
| 0.44  | 1.33E-08 | MXD3                                           | MXD3          | NM_031300 |
| 0.44  | 3.34E-10 |                                                | PGR6          | XM_293092 |
| 0.439 | 3.06E-07 | TETTRAN                                        | TETTRAN       | NM_001120 |
| 0.439 | 1.79E-13 | LGALS9                                         | LGALS9        | NM_002308 |
| 0.438 | 1.99E-08 | ATXN3                                          | MJD           | U63332    |
| 0.438 | 2.22E-07 | CDA                                            | CDA           | NM_001785 |
| 0.438 | 6.13E-09 | STX7                                           | #NA           | AF075045  |
| 0.438 | 1.62E-09 |                                                | #NA           | AK094472  |
| 0.436 | 6.40E-07 | STX1B2                                         | STX1B2        | NM_052874 |
| 0.435 | 1.44E-09 | TFEB                                           | TFEB          | NM_007162 |
| 0.435 | 1.75E-10 |                                                | LOC90326      | XM_352932 |
| 0.433 | 6.37E-09 | RGS12                                          | RGS12         | NM_002926 |
| 0.43  | 2.70E-07 | POLA2                                          | POLA2         | NM_002689 |
| 0.428 | 7.37E-11 |                                                | #NA           | AK057863  |
| 0.427 | 2.81E-08 | PRDM7                                          | PRDM7         | NM_052996 |
| 0.425 | 6.62E-07 | CYP4A11                                        | CYP4A11       | NM_000778 |
| 0.425 | 1.90E-07 | CTSL                                           | CTSL          | NM_001912 |
| 0.424 | 3.66E-08 | UNKL                                           | UNKL          | NM_024023 |
| 0.423 | 4.12E-05 | C14orf58                                       | C14orf58      | NM_017791 |
| 0.423 | 7.56E-09 |                                                | #NA           | AF258587  |
| 0.421 | 9.15E-07 |                                                | #NA           | BC020897  |
| 0.42  | 9.13E-09 |                                                | #NA           | AK093454  |
| 0.416 | 8.05E-10 | SFTPA1                                         | SFTPA2;SFTPA1 | NM_005411 |
| 0.416 | 4.55E-07 |                                                | #NA           | AF085920  |
| 0.416 | 3.58E-07 | FLJ35258                                       | FLJ35258      | AF086519  |
| 0.415 | 2.63E-08 |                                                | HCG4          | NM_018985 |
| 0.412 | 7.43E-08 | LOC161931                                      | LOC161931     | NM_139174 |
| 0.412 | 7.44E-05 | PSMB10                                         | PSMB10        | NM_002801 |
| 0.408 | 5.61E-06 | ERVWE1; Env-W;<br>HERVW; HERV-W;<br>HERV-W-ENV | ERVWE1        | NM_014590 |
| 0.407 | 3.21E-09 | ATP8B2                                         | ATP8B2        | X58235    |
| 0.407 | 1.95E-09 |                                                | #NA           | AK022266  |
| 0.401 | 2.01E-09 | CALCB                                          | CALCB         | XM_350824 |
| 0.398 | 5.22E-06 | MGC14798                                       | MGC14798      | NM_080650 |
| 0.398 | 1.21E-10 | PIP5K2B                                        | #NA           | AK095097  |
| 0.395 | 1.18E-06 |                                                | #NA           | AK074886  |
| 0.38  | 1.65E-08 | ULBP3                                          | ULBP3         | NM_024518 |
| 0.38  | 1.04E-07 |                                                | #NA           | AF086134  |
| 0.378 | 1.74E-08 | FLJ00254                                       | FLJ00254      | AK074181  |
| 0.378 | 1.39E-08 | KIAA1651                                       | KIAA1651      | AB051438  |
| 0.377 | 5.94E-09 |                                                | LOC374466     | XM_353032 |
| 0.373 | 1.81E-09 | POLR3F                                         | POLR3F        | NM_006466 |

**Supplementary Table 3.** Gene expression signature defining prognostic subgroups in AAV. 1228 genes showing differential expression between subgroups 8.1 and 8.2 in a cohort of 59 AAV patients with fold-change greater than 2 and FDR-corrected p-value <0.05. Fold-change (FC) and FDR-corrected p-value (FDR p) are given for each gene along with Gene Symbol and Genbank Accession identifier.

|       |          |               |               |           |
|-------|----------|---------------|---------------|-----------|
| 0.371 | 2.33E-15 | PLA2G12A      | PLA2G12       | NM_030821 |
| 0.371 | 2.18E-05 |               | #NA           | AK098724  |
| 0.37  | 3.30E-12 | MGC4093       | MGC4093       | NM_030578 |
| 0.366 | 6.40E-11 | MFGE8         | MFGE8         | NM_005928 |
| 0.364 | 1.96E-09 | C8orf20       | FLJ22246      | NM_025232 |
| 0.36  | 5.82E-08 | MYOHD1        | FLJ22865      | NM_025109 |
| 0.354 | 1.48E-08 | DKFZP434H2010 | DKFZP434H2010 | NM_032129 |
| 0.354 | 9.07E-10 |               | #NA           | AK022088  |
| 0.353 | 1.69E-12 | SLPI          | SLPI          | NM_003064 |
| 0.343 | 7.33E-10 |               | #NA           | BC039680  |
| 0.342 | 1.85E-09 | KCND3         | KCND3         | NM_172198 |
| 0.334 | 3.58E-09 |               | MECT1         | H43707    |
| 0.331 | 4.26E-11 | ZNF562        | FLJ20079      | NM_017656 |
| 0.326 | 1.07E-08 | FAM48A        | P38IP;DES     | AJ130894  |
| 0.323 | 2.97E-09 | C21orf127     | LOC150035     | AK021678  |
| 0.322 | 2.33E-10 | ADAM17        | ADAM17        | NM_003183 |
| 0.314 | 4.07E-10 | APOL4         | APOL4         | NM_030643 |
| 0.313 | 9.62E-09 |               | LOC284646     | XM_211573 |
| 0.31  | 3.21E-09 | CST9L         | CST9L         | NM_080610 |
| 0.304 | 1.16E-07 | CATX-2        | CATX-2        | AF083118  |
| 0.304 | 6.96E-08 |               | LOC131086     | XM_067193 |
| 0.3   | 1.01E-08 |               | #NA           | AF304443  |
| 0.297 | 4.13E-10 |               | #NA           | AK094159  |
| 0.296 | 3.90E-08 | PAPD4         | #NA           | AF086115  |
| 0.274 | 5.60E-08 |               | TIMM8A        | NM_032696 |
| 0.262 | 2.10E-11 |               | FLJ00310      | BC012753  |
| 0.261 | 1.05E-10 | ANKRD20A      | DKFZp434A171  | NM_032250 |
| 0.25  | 6.44E-10 | FLJ90724      | FLJ90724      | AY188774  |
| 0.22  | 2.69E-08 |               | HSU88895      | NM_015870 |
| 0.174 | 7.65E-08 |               | MGC10997      | NM_032655 |

**Supplementary Table 4: SLE patient cohort demographics and laboratory data**

| Parameter           | Units<br>(ref range)          | S8.1<br>Mean (SEM) | S8.2<br>mean (SEM) | p     | adj p |
|---------------------|-------------------------------|--------------------|--------------------|-------|-------|
| Cohort size         |                               | 7                  | 18                 | na    | na    |
| age                 | years                         | 42.6 (4.3)         | 43.3 (3.2)         | 0.98  | ns    |
| Gender              |                               | 7F / 0M            | 14F / 4M           | 0.17  | ns    |
| Ethnicity           |                               | 7Caucasian         | 16Caucasian        | 0.36  | ns    |
| Serum Cr t0         | µmol/l (35 - 125)             | 115 (42)           | 92 (12)            | 0.95  | ns    |
| Serum Cr final      | µmol/l (35 - 125)             | 114 (30)           | 114 (13)           | 0.45  | ns    |
| CRP t0              | mg/l (0 - 6)                  | 6 (2)              | 9 (4)              | 0.89  | ns    |
| ESR t0              | mm/h (5 - 15)                 | 16 (3)             | 34 (8)             | 0.08  | ns    |
| Total leucocytes t0 | x10 <sup>9</sup> /l (4 - 11)  | 7.5 (1.1)          | 6 (0.5)            | 0.24  | ns    |
| Neutrophils t0      | x10 <sup>9</sup> /l (2 - 8)   | 5.1 (0.8)          | 4.3 (0.4)          | 0.3   | ns    |
| Lymphocytes t0      | x10 <sup>9</sup> /l (1 - 4.5) | 1.73 (0.47)        | 1.22 (0.14)        | 0.54  | ns    |
| ANA titre t0        | iu (0 - 0.9)                  | 4.0 (1.1)          | 3.3 (0.6)          | 0.67  | ns    |
| Total IgG titre t0  | g/l (6 - 13)                  | 9.76 (1.14)        | 14.29 (1.54)       | 0.02  | ns    |
| CD4 t0              | % of PBMC                     | 37.9 (4.2)         | 50.3 (2.9)         | 0.04  | ns    |
| CD8 t0              | % of PBMC                     | 41.7 (3.6)         | 24.4 (3.5)         | 0.008 | ns    |
| CD3 t0              | % of PBMC                     | 81.3 (4.3)         | 77.3 (3.8)         | 0.44  | ns    |
| Anti-dsDNA titre t0 | iu/ml (0 - 10)                | 57 (16)            | 383 (187)          | 0.77  | ns    |
| C3 level t0         | g/l (0.8 - 2.14)              | 0.93 (0.12)        | 1.03 (0.1)         | 0.66  | ns    |
| C4 level t0         | g/l (0.13 - 0.6)              | 0.2 (0.03)         | 0.21 (0.04)        | 0.84  | ns    |
| ANA status          |                               | 6/7                | 16/18              | 0.83  | ns    |
| ds DNA status       |                               | 5/7                | 11/18              | 0.63  | ns    |
| ENA status          |                               | 5/7                | 9/18               | 0.33  | ns    |
| Low C3/4            |                               | 2/7                | 8/18               | 0.47  | ns    |

adj p = Bonferroni adjusted p-value, ref range = reference range, SEM = standard error of mean, t0 = at time zero enrolment, t3months = at 3 month follow-up timepoint, M=male, F=female, ns = p>0.05, CRP = C-reactive protein, ESR = erythrocyte sedimentation rate, PBMC = peripheral blood mononuclear cells, SCr = serum creatinine, anti-dsDNA = anti-double-stranded DNA antibodies, BILAG = British Isles Lupus Assessment Group score, ACR = American College of Rheumatology, Anti-Phos Ab = Anti-phospholipid antibody positive at any timepoint during follow-up, ENA = extractable nuclear antigen, serum Cr = serum creatinine, ANA = anti-nuclear antibody, Low C3/4 = hypocomplementaemia at any timepoint during follow-up, Renal involvement = biopsy-proven renal SLE involvement at any timepoint during follow-up, Pre-existing disease = diagnosis of SLE made prior to enrolment disease flare, Current treatment t0 = any therapy being taken at time of enrolment, No ACR criteria = mean no of ACR classification criteria met (at any timepoint during follow-up)

**Supplementary Table 4: SLE patient cohort demographics and laboratory data**

|                    |      |       |       |    |
|--------------------|------|-------|-------|----|
| Anti-Phos Ab       | 0/7  | 3/18  | 0.29  | ns |
| No. ACR criteria   | 5.4  | 5.3   | 0.46  | ns |
| Renal involvement  | 3/7  | 8/18  | 0.94  | ns |
| Pre-existing       | 7/7  | 13/18 | 0.006 | ns |
| Current therapy t0 | 5/7  | 7/18  | 0.14  | ns |
| BILAG score t0     | 19.4 | 15.1  | 0.04  | ns |

adj p = Bonferroni adjusted p-value, ref range = reference range, SEM = standard error of mean, t0 = at time zero enrolment, t3months = at 3 month follow-up timepoint, M=male, F=female, ns = p>0.05, CRP = C-reactive protein, ESR = erythrocyte sedimentation rate, PBMC = peripheral blood mononuclear cells, SCr = serum creatinine, anti-dsDNA = anti-double-stranded DNA antibodies, BILAG = British Isles Lupus Assessment Group score, ACR = American College of Rheumatology, Anti-Phos Ab = Anti-phospholipid antibody positive at any timepoint during follow-up, ENA = extractable nuclear antigen, serum Cr = serum creatinine, ANA = anti-nuclear antibody, Low C3/4 = hypocomplementaemia at any timepoint during follow-up, Renal involvement = biopsy-proven renal SLE involvement at any timepoint during follow-up, Pre-existing disease = diagnosis of SLE made prior to enrolment disease flare, Current treatment t0 = any therapy being taken at time of enrolment, No ACR criteria = mean no of ACR classification criteria met (at any timepoint during follow-up)

## Supplementary Table 5: SLE cohort 1

|                      |                       | 8.1 | %   | 8.2   | %  | p     | adj p |
|----------------------|-----------------------|-----|-----|-------|----|-------|-------|
| Prior therapy        | Cyclophosphamide      | 4/7 | 57  | 3/18  | 17 | 0.040 | ns    |
|                      | Rituximab             | 3/7 | 43  | 0/18  | 0  | 0.003 | 0.021 |
|                      | Mycophenolate Mofetil | 7/7 | 100 | 5/18  | 28 | 0.001 | 0.007 |
|                      | Azathioprine          | 4/7 | 57  | 4/18  | 22 | 0.090 | ns    |
|                      | Methotrexate          | 0/7 | 0   | 1/18  | 6  | 0.520 | ns    |
|                      | Hydroxychloroquine    | 0/7 | 0   | 3/18  | 17 | 0.250 | ns    |
| Current therapy t0   | Prednisolone          | 5/7 | 71  | 5/18  | 28 | 0.050 | ns    |
|                      | Mycophenolate Mofetil | 3/7 | 43  | 2/18  | 11 | 0.070 | ns    |
|                      | Azathioprine          | 0/7 | 0   | 2/18  | 11 | 0.360 | ns    |
|                      | Methotrexate          | 0/7 | 0   | 1/18  | 6  | 0.520 | ns    |
|                      | Hydroxychloroquine    | 1/7 | 14  | 1/18  | 6  | 0.470 | ns    |
| Induction therapy t0 | Cyclophosphamide      | 2/7 | 29  | 3/18  | 17 | 0.500 | ns    |
|                      | Rituximab             | 7/7 | 100 | 5/18  | 28 | 0.001 | 0.007 |
|                      | Mycophenolate Mofetil | 2/7 | 29  | 3/18  | 17 | 0.500 | ns    |
|                      | Azathioprine          | 0/7 | 0   | 5/18  | 28 | 0.120 | ns    |
|                      | Methotrexate          | 0/7 | 0   | 1/18  | 6  | 0.520 | ns    |
|                      | Hydroxychloroquine    | 1/7 | 14  | 7/18  | 39 | 0.240 | ns    |
|                      | Prednisolone          | 7/7 | 100 | 17/18 | 94 | 0.52  | ns    |
| FollowUp therapy     | Cyclophosphamide      | 3/7 | 43  | 3/18  | 17 | 0.170 | ns    |
|                      | Rituximab             | 7/7 | 100 | 5/18  | 28 | 0.001 | 0.01  |
|                      | Mycophenolate Mofetil | 4/7 | 57  | 7/18  | 39 | 0.410 | ns    |
|                      | Azathioprine          | 0/7 | 0   | 5/18  | 28 | 0.120 | ns    |
|                      | Methotrexate          | 0/7 | 0   | 1/18  | 6  | 0.520 | ns    |
|                      | Hydroxychloroquine    | 1/7 | 14  | 6/18  | 33 | 0.340 | ns    |
|                      | Prednisolone          | 7/7 | 100 | 17/18 | 94 | 0.520 | ns    |

t0 = at time zero enrolment, ns =  $p > 0.05$ , adj p = Bonferroni-adjusted p-value, Prior therapy = therapy administered prior to enrolment, Current therapy = therapy being given at time of enrolment bleed, Induction therapy = therapy given after enrolment bleed to control t0 disease flare, Follow-up therapy = therapy given at any timepoint during subsequent follow-up. Note that the nature of therapy but not dosage is given and that, by definition, each flare of disease required increased immunosuppression with resulting higher cumulative doses during follow-up in subgroup 8.1.

### Supplementary Table 6: Control Demographics

|           | Control 1 | C8.1 <sup>a</sup> | C8.2 <sup>a</sup> | P <sup>b</sup> | Control 2 | Control 3   |
|-----------|-----------|-------------------|-------------------|----------------|-----------|-------------|
| Number    | 22        | 4                 | 18                |                | 18        | 27          |
| Mean Age  | 47.5      | 45                | 48.1              | 0.64           | 44.7      | 39.4        |
| (range)   | (25 – 76) | (40 – 58)         | (25 – 76)         |                | (20 – 70) | (21 - 76)   |
| Sex       | 12F/10M   | 2F/2M             | 10F/8M            | 0.84           | 12F/6M    | 23F/4M      |
| Ethnicity | Caucasian | Caucasian         | Caucasian         |                | Caucasian | Singaporean |

<sup>a</sup> number of 8.1 and 8.2 individuals in the Control 1 cohort

<sup>b</sup> p value refers to the comparison of the 8.1 and 8.2 individuals in the Control 1 cohort



**Supplementary Tables 7a and b**

| Distribution | Matched genes / n | % of total list |
|--------------|-------------------|-----------------|
| Log Normal   | 6                 | 1.5             |
| Bimodal      | 40                | 10.2            |
| Normal       | 311               | 79.3            |
| Left skew    | 13                | 3.3             |
| Right skew   | 20                | 5.2             |
| Exponential  | 2                 | 0.5             |
| Uniform      | 0                 | 0               |
| <b>Total</b> | <b>392</b>        | <b>100</b>      |

**Supplementary Table 7a: Gene expression density distributions matched to genes defining a randomly assigned subdivision of the AAV cohort**

| Distribution | Matched genes | % of total list |
|--------------|---------------|-----------------|
| Log Normal   | 112           | 6               |
| Bimodal      | 1251          | 67.3            |
| Normal       | 266           | 14.3            |
| Left skew    | 190           | 10.2            |
| Right skew   | 36            | 1.9             |
| Exponential  | 1             | 0.1             |
| Uniform      | 4             | 0.2             |
| <b>Total</b> | <b>1860</b>   | <b>100</b>      |

**Supplementary Table 7b: Gene expression density distributions matched to genes defining subgroups 8.1 and 8.2**
